# Supplementary material
Source: publisher site journal article supplement (https://zse.pensoft.net/article/48312/download/suppl/31/)
Supplement: Supplementary file 1

## Sheet: Cover
Zoosystematics and Evolution
Appendix A
A revision of the extant species of Theodoxus (Gastropoda: Neritidae) in Asia, with the description of three new species
Arthur F. Sands, Peter Glöer, Mustafa E. Gürlek, Christian Albrecht, Thomas A. Neubauer
Appendix A:
Table S1	Collection, location and GenBank accession details of all specimens incorporated into the phylogeny.
Table S2	Collection details of all specimens and type material photographed for the current study.
Table S3	Divergence dates and highest posterior densities of nodes labelled in the phylogeny (Fig. 2).

## Sheet: Table S1
Table S1. Collection, location and GenBank accession details of all specimens incorporated into the phylogeny.
Preparation No.	UGSB/locality/receivedmaterialcode	GPS coordinates		Country	Original identification	Observed species (current outcome)	Study	GenBank accession numbers
		Latitude	Longitude					COI	16S	ATPα
21144	UGSB14804	-1.65167	124.571	Indonesia	Neritina canalis	Neritina canalis	Sands et al. 2019a	MK754669	MK755009	na
19173	UGSB11577	-20.9164	55.6132	Reunion	Neritina gagates	Neritina gagates	Sands et al. 2019a	MK754667	MK755007	na
24332	UGSB19434	X	X	Commercial stock: Germany	Neritina natalensis	Neritina natalensis	Sands et al. 2019a	MK754815	MK755159	na
NOGB1	na	5.7856	0.580728	Ghana	Neritina oweniana	Neritina oweniana	Frey and Vermeij 2008	EU732365	EU732202	na
26046	UGSB21714	30.4339	48.1993	Iran	Neritina schlaeflii	Neritina schlaeflii	Sequenced for this study	MN657573	MN650319	na
21819	UGSB15858	-4.67458	55.4454	Seychelles	Neritina sp.	Neritina sp.	Sands et al. 2019a	MK754670	na	na
5586	CA2005.37	37.11	30.5804	Turkey	Theodoxus altenai	Theodoxus altenai	Sands et al. 2019a	MK754475	MK754817	MK755161
5587	UGSB24167	37.11	30.5804	Turkey	Theodoxus altenai	Theodoxus altenai	Sands et al. 2019a	MK754476	MK754818	MK755162
9348	RM09.137	36.9637	30.7266	Turkey	Theodoxus altenai	Theodoxus altenai	Sands et al. 2019a	MK754552	MK754894	MK755222
9349	RM09.137	36.9637	30.7266	Turkey	Theodoxus altenai	Theodoxus altenai	Sands et al. 2019a	MK754553	MK754895	MK755223
9350	RM09.138	37.11	30.5805	Turkey	Theodoxus altenai	Theodoxus altenai	Sands et al. 2019a	MK754554	MK754896	MK755224
9351	RM09.138	37.11	30.5805	Turkey	Theodoxus altenai	Theodoxus altenai	Sands et al. 2019a	MK754555	MK754897	MK755225
9334	RM09.131	37.6781	27.164	Turkey	Theodoxus anatolicus	Theodoxus anatolicus	Sands et al. 2019a	MK754545	MK754887	MK755218
9335	RM09.131	37.6781	27.164	Turkey	Theodoxus anatolicus	Theodoxus anatolicus	Sands et al. 2019a	MK754546	MK754888	MK755219
11400	RM09.60	37.5448	29.9439	Turkey	Theodoxus anatolicus	Theodoxus anatolicus	Sands et al. 2019a	MK754580	MK754922	MK755245
11401	RM09.60	37.5448	29.9439	Turkey	Theodoxus anatolicus	Theodoxus anatolicus	Sands et al. 2019a	MK754581	MK754923	MK755246
11402	RM09.61	37.6029	29.9557	Turkey	Theodoxus anatolicus	Theodoxus anatolicus	Sands et al. 2019a	MK754582	MK754924	MK755247
11403	RM09.61	37.6029	29.9557	Turkey	Theodoxus anatolicus	Theodoxus anatolicus	Sands et al. 2019a	MK754583	MK754925	MK755248
11408	UGSB24168	38.3231	29.8514	Turkey	Theodoxus anatolicus	Theodoxus anatolicus	Sands et al. 2019a	MK754586	MK754928	MK755251
11410	RM09.65	37.7381	29.1642	Turkey	Theodoxus anatolicus	Theodoxus anatolicus	Sands et al. 2019a	MK754588	MK754930	MK755253
11411	RM09.65	37.7381	29.1642	Turkey	Theodoxus anatolicus	Theodoxus anatolicus	Sands et al. 2019a	MK754589	MK754931	MK755254
6354	RM06.333	40.0528	19.8128	Albania	Theodoxus varius cf. varius	Theodoxus baeticus	Sands et al. 2019a	MK754479	MK754821	MK755165
7910	BA05.60	38.5904	21.601	Greece	Theodoxus varius callosus	Theodoxus baeticus	Sands et al. 2019a	MK754497	MK754839	MK755179
7911	UGSB24169	38.5904	21.601	Greece	Theodoxus varius callosus	Theodoxus baeticus	Sands et al. 2019a	MK754498	MK754840	MK755180
7913	BA05.51	38.5889	21.467	Greece	Theodoxus varius callosus	Theodoxus baeticus	Sands et al. 2019a	MK754499	MK754841	MK755181
8129	UGSB24170	39.9234	20.1927	Albania	Theodoxus varius cf. varius	Theodoxus baeticus	Sands et al. 2019a	MK754507	MK754849	MK755186
8130	RM07.481	40.0351	19.8593	Albania	Theodoxus varius cf. varius	Theodoxus baeticus	Sands et al. 2019a	MK754508	MK754850	MK755187
8140	BA07.50	38.9181	20.8659	Greece	Theodoxus varius callosus	Theodoxus baeticus	Sands et al. 2019a	MK754511	MK754853	MK755190
8143	BA07.59	38.536	21.6492	Greece	Theodoxus varius callosus	Theodoxus baeticus	Sands et al. 2019a	MK754512	MK754854	MK755191
8145	BA07.65	38.6713	21.3403	Greece	Theodoxus varius callosus	Theodoxus baeticus	Sands et al. 2019a	MK754513	MK754855	MK755192
8146	BA07.66	38.5617	21.3529	Greece	Theodoxus varius callosus	Theodoxus baeticus	Sands et al. 2019a	MK754514	MK754856	MK755193
8904	BA05.49	38.5834	21.649	Greece	Theodoxus varius callosus	Theodoxus baeticus	Sands et al. 2019a	MK754521	MK754863	MK755198
9359	RM09.143	37.032	28.0981	Turkey	Theodoxus varius callosus	Theodoxus baeticus	Sands et al. 2019a	MK754558	MK754900	MK755228
11412	RM09.66	37.0552	28.3329	Turkey	Theodoxus varius callosus	Theodoxus baeticus	Sands et al. 2019a	MK754590	MK754932	MK755255
11425	RM09.50	37.6466	-7.6517	Portugal	Theodoxus guadianensis	Theodoxus baeticus	Sands et al. 2019a	MK754594	MK754936	MK755257
14198	RM10.142	37.3216	-3.45283	Spain	Theodoxus meridionalis	Theodoxus baeticus	Sands et al. 2019a	MK754617	MK754958	MK755281
18880	UGSB11234	37.8063	-7.63263	Portugal	Theodoxus guadianensis	Theodoxus baeticus	Sands et al. 2019a	MK754660	MK755000	MK755320
18881	UGSB11235	37.8063	-7.63263	Portugal	Theodoxus guadianensis	Theodoxus baeticus	Sands et al. 2019a	MK754661	MK755001	MK755321
18884	UGSB11239	37.6413	-7.65662	Portugal	Theodoxus guadianensis	Theodoxus baeticus	Sands et al. 2019a	MK754662	MK755002	MK755322
18888	UGSB11246	40.2005	-8.42525	Portugal	Theodoxus cf. elongatulus	Theodoxus baeticus	Sands et al. 2019a	MK754663	MK755003	MK755323
18889	UGSB11247	40.2005	-8.42525	Portugal	Theodoxus cf. elongatulus	Theodoxus baeticus	Sands et al. 2019a	MK754664	MK755004	MK755324
18890	UGSB11248	40.2005	-8.42525	Portugal	Theodoxus cf. elongatulus	Theodoxus baeticus	Sands et al. 2019a	MK754665	MK755005	MK755325
22782	UGSB17286	33.8817	10.0835	Tunisia	Theodoxus meridionalis	Theodoxus baeticus	Sands et al. 2019a	MK754671	MK755010	MK755327
22789	UGSB17290	33.7587	10.2064	Tunisia	Theodoxus meridionalis	Theodoxus baeticus	Sands et al. 2019a	MK754672	MK755011	MK755328
23451	UGSB18107	33.8817	10.0835	Tunisia	Theodoxus meridionalis	Theodoxus baeticus	Sands et al. 2019a	MK754739	MK755078	MK755388
23452	UGSB18108	33.8817	10.0835	Tunisia	Theodoxus meridionalis	Theodoxus baeticus	Sands et al. 2019a	MK754740	MK755079	MK755389
23453	UGSB18109	33.8817	10.0835	Tunisia	Theodoxus meridionalis	Theodoxus baeticus	Sands et al. 2019a	MK754741	MK755080	MK755390
23454	UGSB18110	33.7587	10.2064	Tunisia	Theodoxus meridionalis	Theodoxus baeticus	Sands et al. 2019a	MK754742	MK755081	MK755391
23455	UGSB18111	33.7587	10.2064	Tunisia	Theodoxus meridionalis	Theodoxus baeticus	Sands et al. 2019a	MK754743	MK755082	MK755392
23456	UGSB18112	33.7587	10.2064	Tunisia	Theodoxus meridionalis	Theodoxus baeticus	Sands et al. 2019a	MK754744	MK755083	MK755393
23457	UGSB18113	34.1084	9.98212	Tunisia	Theodoxus meridionalis	Theodoxus baeticus	Sands et al. 2019a	MK754745	MK755084	MK755394
23458	UGSB18114	34.1084	9.98212	Tunisia	Theodoxus meridionalis	Theodoxus baeticus	Sands et al. 2019a	MK754746	MK755085	MK755395
23459	UGSB18115	34.1084	9.98212	Tunisia	Theodoxus meridionalis	Theodoxus baeticus	Sands et al. 2019a	MK754747	MK755086	MK755396
24168	UGSB19140	37.0552	28.3329	Turkey	Theodoxus varius callosus	Theodoxus baeticus	Sands et al. 2019a	MK754800	MK755144	MK755449
24173	UGSB19150	39.766	2.71534	Spain	Theodoxus baeticus	Theodoxus baeticus	Sands et al. 2019a	MK754803	MK755147	MK755451
24180	UGSB19162	39.766	2.71534	Spain	Theodoxus baeticus	Theodoxus baeticus	Sands et al. 2019a	MK754810	MK755154	MK755453
24183	UGSB19169	39.766	2.71534	Spain	Theodoxus baeticus	Theodoxus baeticus	Sands et al. 2019a	MK754813	MK755157	MK755454
25237	UGSB20727	40.924064	-1.30014	Spain	Theodoxus meridionalis	Theodoxus baeticus	Sequenced for this study	MN657531	MN650276	MN657478
25238	UGSB20728	40.924064	-1.30014	Spain	Theodoxus meridionalis	Theodoxus baeticus	Sequenced for this study	MN657532	MN650277	MN657479
25239	UGSB20729	40.9219	-1.30242	Spain	Theodoxus meridionalis	Theodoxus baeticus	Sequenced for this study	MN657533	MN650278	MN657480
25240	UGSB20730	40.9219	-1.30242	Spain	Theodoxus meridionalis	Theodoxus baeticus	Sequenced for this study	MN657534	MN650279	MN657481
25241	UGSB20731	40.9203	-1.30257	Spain	Theodoxus meridionalis	Theodoxus baeticus	Sequenced for this study	MN657535	MN650280	MN657482
25242	UGSB20732	40.9203	-1.30257	Spain	Theodoxus meridionalis	Theodoxus baeticus	Sequenced for this study	MN657536	MN650281	MN657483
25243	UGSB20733	40.9179	-1.30267	Spain	Theodoxus meridionalis	Theodoxus baeticus	Sequenced for this study	MN657537	MN650282	MN657484
25244	UGSB20734	40.9179	-1.30267	Spain	Theodoxus meridionalis	Theodoxus baeticus	Sequenced for this study	MN657538	MN650283	MN657485
26308	UGSB22080	39.9786	-8.57292	Portugal	Theodoxus elongatulus	Theodoxus baeticus	Sequenced for this study	MN657574	MN650320	MN657503
26309	UGSB22081	39.9786	-8.57292	Portugal	Theodoxus elongatulus	Theodoxus baeticus	Sequenced for this study	MN657575	MN650321	MN657504
26310	UGSB22082	40.0742	-0.533917	Spain	Theodoxus velascoi	Theodoxus baeticus	Sequenced for this study	MN657576	MN650322	MN657505
26311	UGSB22083	40.0742	-0.533917	Spain	Theodoxus velascoi	Theodoxus baeticus	Sequenced for this study	MN657577	MN650323	MN657506
26312	UGSB22084	37.5553	-7.53345	Portugal	Theodoxus guadianensis	Theodoxus baeticus	Sequenced for this study	MN657578	MN650324	MN657507
26313	UGSB22085	37.5553	-7.53345	Portugal	Theodoxus guadianensis	Theodoxus baeticus	Sequenced for this study	MN657579	MN650325	MN657508
26314	UGSB22086	39.1357	-0.524633	Spain	Theodoxus cf. valentinus	Theodoxus baeticus	Sequenced for this study	MN657580	MN650326	MN657509
26315	UGSB22087	39.1357	-0.524633	Spain	Theodoxus cf. valentinus	Theodoxus baeticus	Sequenced for this study	MN657581	MN650327	MN657510
26317	UGSB22089	37.8189	-2.76768	Spain	Theodoxus baeticus	Theodoxus baeticus	Sequenced for this study	MN657582	MN650328	MN657511
26318	UGSB22090	39.8777	-0.501717	Spain	Theodoxus meridionalis	Theodoxus baeticus	Sequenced for this study	MN657583	MN650329	MN657512
26319	UGSB22091	39.8777	-0.501717	Spain	Theodoxus meridionalis	Theodoxus baeticus	Sequenced for this study	MN657584	MN650330	MN657513
TB001	na	39.4859	-0.4423	Spain	Theodoxus baeticus	Theodoxus baeticus	Bunje and Lindberg 2007	AY771277	AY771234	na
TB007	na	39.0203	-0.64545	Spain	Theodoxus baeticus	Theodoxus baeticus	Bunje and Lindberg 2007	AY771278	AY771235	na
TB013	na	39.418	-0.80059	Spain	Theodoxus baeticus	Theodoxus baeticus	Bunje and Lindberg 2007	AY771279	AY771234	na
TM001	na	38.0288	14.0165	Italy	Theodoxus meridionalis	Theodoxus baeticus	Bunje and Lindberg 2007	AY771291	AY771252	na
TM005	na	37.1576	15.0267	Italy	Theodoxus meridionalis	Theodoxus baeticus	Bunje and Lindberg 2007	AY771292	AY771253	na
TV001	na	39.1362	-0.52517	Spain	Theodoxus valentinus	Theodoxus baeticus	Bunje and Lindberg 2007	AY771296	AY771268	na
TV002	na	39.1362	-0.52517	Spain	Theodoxus valentinus	Theodoxus baeticus	Bunje and Lindberg 2007	AY771297	AY771234	na
TX013	na	X	X	Tunisia	Theodoxus meridionalis	Theodoxus baeticus	Bunje and Lindberg 2007	na	AY771262	na
7901	RM06.308	43.92517	22.12950	Serbia	Theodoxus danubialis	Theodoxus danubialis	Sands et al. 2019a	MK754494	MK754836	na
8918	RM08.077	46.7575	15.8403	Austria	Theodoxus danubialis	Theodoxus danubialis	Sands et al. 2019a	MK754526	MK754868	na
8919	RM08.077	46.7575	15.8403	Austria	Theodoxus danubialis	Theodoxus danubialis	Sands et al. 2019a	MK754527	MK754869	na
23556	UGSB18452	46.0848	14.6454	Slovenia	Theodoxus danubialis	Theodoxus danubialis	Sands et al. 2019a	MK754767	MK755106	na
23557	UGSB18453	46.0848	14.6454	Slovenia	Theodoxus danubialis	Theodoxus danubialis	Sands et al. 2019a	MK754768	MK755107	na
24174	UGSB19153	47.9332	16.2126	Austria	Theodoxus prevostianus	Theodoxus danubialis	Sands et al. 2019a	MK754804	MK755148	na
24175	UGSB19154	47.8347	16.1714	Austria	Theodoxus prevostianus	Theodoxus danubialis	Sands et al. 2019a	MK754805	MK755149	na
24181	UGSB19165	47.9332	16.2126	Austria	Theodoxus prevostianus	Theodoxus danubialis	Sands et al. 2019a	MK754811	MK755155	na
24182	UGSB19166	47.8347	16.1714	Austria	Theodoxus prevostianus	Theodoxus danubialis	Sands et al. 2019a	MK754812	MK755156	na
TD005	na	45.5724	10.7091	Italy	Theodoxus danubialis	Theodoxus danubialis	Bunje and Lindberg 2007	AY771280	AY771236	na
TD093	na	48.0052	16.5693	Austria	Theodoxus danubialis	Theodoxus danubialis	Bunje and Lindberg 2007	AY771281	AY771236	na
TD137	na	46.8364	17.109	Hungary	Theodoxus danubialis	Theodoxus danubialis	Bunje and Lindberg 2007	AY771282	AY771238	na
TP001	na	47.9664	16.2143	Austria	Theodoxus prevostianus	Theodoxus danubialis	Bunje and Lindberg 2007	AY771293	AY771254	na
TP032	na	47.9588	20.6131	Hungary	Theodoxus prevostianus	Theodoxus danubialis	Bunje and Lindberg 2007	AY771294	AY771255	na
6348	RM06.327	43.0431	17.4982	Croatia	Theodoxus fluviatilis s.l.	Theodoxus fluviatilis	Sands et al. 2019a	MK754477	MK754819	MK755163
6352	RM06.331	43.4498	16.6932	Croatia	Theodoxus fluviatilis s.l.	Theodoxus fluviatilis	Sands et al. 2019a	MK754478	MK754820	MK755164
6357	RM06.342	46.5827	18.8724	Hungary	Theodoxus cf. danasteri	Theodoxus fluviatilis	Sands et al. 2019a	MK754480	MK754822	MK755166
6360	RM06.349	43.2458	17.8386	Bosnia and Herzegovina	Theodoxus fluviatilis s.l.	Theodoxus fluviatilis	Sands et al. 2019a	MK754481	MK754823	MK755167
6361	RM06.351	43.9065	15.9745	Croatia	Theodoxus fluviatilis s.l.	Theodoxus fluviatilis	Sands et al. 2019a	MK754482	MK754824	MK755168
6404	RM06.403	45.3097	29.6824	Ukraine	Theodoxus cf. euxinus	Theodoxus fluviatilis	Sands et al. 2019a	MK754484	MK754826	MK755170
6406	RM06.405	45.3081	29.6875	Ukraine	Theodoxus cf. euxinus	Theodoxus fluviatilis	Sands et al. 2019a	MK754485	MK754827	MK755171
6830	RM06.143	42.3253	19.3628	Montenegro	Theodoxus fluviatilis s.l.	Theodoxus fluviatilis	Sands et al. 2019a	MK754489	MK754831	na
7893	RM06.142	41.1635	20.2304	Albania	Theodoxus fluviatilis s.l.	Theodoxus fluviatilis	Sands et al. 2019a	MK754490	MK754832	MK755175
7900	RM06.370	43.1696	17.4312	Croatia	Theodoxus fluviatilis s.l.	Theodoxus fluviatilis	Sands et al. 2019a	MK754493	MK754835	MK755178
7902	RM06.310	41.04761	20.80156	Macedonia	Theodoxus fluviatilis s.l.	Theodoxus fluviatilis	Sands et al. 2019a	MK754495	MK754837	na
7907	BA05.84	41.0423	20.804	Macedonia	Theodoxus fluviatilis s.l.	Theodoxus fluviatilis	Sands et al. 2019a	MK754496	MK754838	na
7915	RM06.126	35.4343	24.1272	Greece	Theodoxus saulcyi	Theodoxus fluviatilis	Sands et al. 2019a	MK754500	MK754842	MK755182
7935	RM07.79	44.6978	37.5969	Russia	Theodoxus cf. euxinus	Theodoxus fluviatilis	Sands et al. 2019a	MK754506	MK754848	MK755185
8133	TW95.01	41.637	28.093	Turkey	Theodoxus cf. euxinus	Theodoxus fluviatilis	Sands et al. 2019a	MK754509	MK754851	MK755188
8134	UGSB24172	41.637	28.093	Turkey	Theodoxus cf. euxinus	Theodoxus fluviatilis	Sands et al. 2019a	MK754510	MK754852	MK755189
8148	BA07.88	40.4862	22.2577	Greece	Theodoxus fluviatilis s.l.	Theodoxus fluviatilis	Sands et al. 2019a	MK754515	MK754857	MK755194
8898	BA07.34	40.8113	20.745	Macedonia	Theodoxus fluviatilis s.l.	Theodoxus fluviatilis	Sands et al. 2019a	MK754519	MK754861	na
8899	BA05.127	41.3358	20.6347	Macedonia	Theodoxus fluviatilis s.l.	Theodoxus fluviatilis	Sands et al. 2019a	MK754520	MK754862	na
8907	RM05.89	37.88	30.7242	Turkey	Theodoxus cf. heldreichi	Theodoxus fluviatilis	Sands et al. 2019a	MK754522	MK754864	MK755199
8909	RM08.075	42.0603	27.9669	Bulgaria	Theodoxus cf. euxinus	Theodoxus fluviatilis	Sands et al. 2019a	MK754523	MK754865	MK755200
8913	RM08.076	41.2211	23.8932	Greece	Theodoxus fluviatilis s.l.	Theodoxus fluviatilis	Sands et al. 2019a	MK754524	MK754866	MK755201
8915	RM07.54	41.1	20.1245	Albania	Theodoxus fluviatilis s.l.	Theodoxus fluviatilis	Sands et al. 2019a	MK754525	MK754867	MK755202
8920	RM08.078	54.2891	10.0911	Germany	Theodoxus fluviatilis s.l.	Theodoxus fluviatilis	Sands et al. 2019a	MK754528	MK754870	na
9127	PC08-38	42.3304	41.9016	Georgia	Theodoxus fluviatilis s.l.	Theodoxus fluviatilis	Sands et al. 2019a	MK754538	MK754880	MK755212
9131	PC08-41	41.9332	41.831	Georgia	Theodoxus subthermalis	Theodoxus fluviatilis	Sands et al. 2019a	MK754539	MK754881	MK755213
9133	PC08-42	41.9425	41.8813	Georgia	Theodoxus subthermalis	Theodoxus fluviatilis	Sands et al. 2019a	MK754540	MK754882	MK755214
9329	RM09.129	36.9558	28.6938	Turkey	Theodoxus fluviatilis s.l.	Theodoxus fluviatilis	Sands et al. 2019a	MK754543	MK754885	MK755217
9337	RM09.132	37.0552	28.3388	Turkey	Theodoxus fluviatilis s.l.	Theodoxus fluviatilis	Sands et al. 2019a	MK754547	MK754889	MK755220
9339	RM09.133	36.9889	28.2967	Turkey	Theodoxus fluviatilis s.l.	Theodoxus fluviatilis	Sands et al. 2019a	MK754548	MK754890	MK755221
9340	RM09.134	36.9183	28.7959	Turkey	Theodoxus fluviatilis s.l.	Theodoxus fluviatilis	Sands et al. 2019a	MK754549	MK754891	na
9343	RM09.135	36.8248	28.6343	Turkey	Theodoxus cf. euxinus	Theodoxus fluviatilis	Sands et al. 2019a	MK754550	MK754892	na
9345	RM09.136	36.3138	30.1353	Turkey	Theodoxus fluviatilis s.l.	Theodoxus fluviatilis	Sands et al. 2019a	MK754551	MK754893	na
9354	UGSB24174	37.9726	30.9616	Turkey	Theodoxus cf. heldreichi	Theodoxus fluviatilis	Sands et al. 2019a	MK754556	MK754898	MK755226
9357	RM09.142	37.7725	29.8433	Turkey	Theodoxus cf. heldreichi	Theodoxus fluviatilis	Sands et al. 2019a	MK754557	MK754899	MK755227
9362	RM09.144	40.2037	28.4413	Turkey	Theodoxus cf. euxinus	Theodoxus fluviatilis	Sands et al. 2019a	MK754559	MK754901	MK755229
9363	RM08.112	35.3384	24.2778	Greece	Theodoxus saulcyi	Theodoxus fluviatilis	Sands et al. 2019a	MK754560	MK754902	MK755230
9389	RM09.145	44.1403	27.0338	Bulgaria	Theodoxus cf. euxinus	Theodoxus fluviatilis	Sands et al. 2019a	MK754561	MK754903	MK755231
9394	RM09.147	43.4099	27.9628	Bulgaria	Theodoxus cf. euxinus	Theodoxus fluviatilis	Sands et al. 2019a	MK754562	MK754904	MK755232
9527	RM08.145	41.018	28.748	Turkey	Theodoxus fluviatilis s.l.	Theodoxus fluviatilis	Sands et al. 2019a	MK754563	MK754905	MK755233
9541	RM08.150	47.2803	29.1267	Moldova	Theodoxus cf. euxinus	Theodoxus fluviatilis	Sands et al. 2019a	MK754564	MK754906	MK755234
9632	RM07.44	46.4247	0.264	France	Theodoxus fluviatilis s.l.	Theodoxus fluviatilis	Sands et al. 2019a	MK754565	MK754907	MK755235
9634	RM07.485	39.5578	21.7601	Greece	Theodoxus fluviatilis s.l.	Theodoxus fluviatilis	Sands et al. 2019a	MK754566	MK754908	MK755236
11387	RM09.52	36.7758	31.4479	Turkey	Theodoxus fluviatilis s.l.	Theodoxus fluviatilis	Sands et al. 2019a	MK754571	MK754913	MK755241
11397	RM09.58	36.3954	30.4727	Turkey	Theodoxus fluviatilis s.l.	Theodoxus fluviatilis	Sands et al. 2019a	MK754579	MK754921	MK755244
11405	RM09.62	38.0748	30.2756	Turkey	Theodoxus cf. heldreichi	Theodoxus fluviatilis	Sands et al. 2019a	MK754584	MK754926	MK755249
11406	RM09.63	38.2052	30.0476	Turkey	Theodoxus cf. heldreichi	Theodoxus fluviatilis	Sands et al. 2019a	MK754585	MK754927	MK755250
11409	RM09.64	38.3231	29.8514	Turkey	Theodoxus cf. heldreichi	Theodoxus fluviatilis	Sands et al. 2019a	MK754587	MK754929	MK755252
11413	RM09.67	36.8885	28.7034	Turkey	Theodoxus fluviatilis s.l.	Theodoxus fluviatilis	Sands et al. 2019a	MK754591	MK754933	na
11416	RM09.69	37.0274	28.3688	Turkey	Theodoxus fluviatilis s.l.	Theodoxus fluviatilis	Sands et al. 2019a	MK754592	MK754934	na
11878	RM09.84	48.1925	16.4669	Austria	Theodoxus fluviatilis s.l.	Theodoxus fluviatilis	Sands et al. 2019a	MK754595	MK754937	MK755258
11879	BiH09.01	43.0329	17.7369	Bosnia and Herzegovina	Theodoxus fluviatilis s.l.	Theodoxus fluviatilis	Sands et al. 2019a	MK754596	MK754938	MK755259
11880	ROM09.001	45.4303	28.0598	Romania	Theodoxus fluviatilis s.l.	Theodoxus fluviatilis	Sands et al. 2019a	MK754597	MK754939	MK755260
12883	RM09.119	45.3576	13.7377	Croatia	Theodoxus fluviatilis s.l.	Theodoxus fluviatilis	Sands et al. 2019a	MK754599	MK754941	MK755262
12884	RM09.118	41.0936	-8.52207	Portugal	Theodoxus fluviatilis s.l.	Theodoxus fluviatilis	Sands et al. 2019a	MK754600	MK754942	MK755263
12886	AUT09.002	48.1507	16.9439	Austria	Theodoxus fluviatilis s.l.	Theodoxus fluviatilis	Sands et al. 2019a	MK754601	MK754943	MK755264
12887	AUT09.009	48.347	15.9129	Austria	Theodoxus cf. danasteri	Theodoxus fluviatilis	Sands et al. 2019a	MK754602	MK754944	MK755265
12888	AUT09.016	48.3044	14.2753	Austria	Theodoxus fluviatilis s.l.	Theodoxus fluviatilis	Sands et al. 2019a	MK754603	MK754945	MK755266
12889	HUN09.002	47.7517	18.4849	Hungary	Theodoxus fluviatilis s.l.	Theodoxus fluviatilis	Sands et al. 2019a	MK754604	MK754946	MK755267
12890	HUN09.002	47.7517	18.4849	Hungary	Theodoxus fluviatilis s.l.	Theodoxus fluviatilis	Sands et al. 2019a	MK754605	MK754947	MK755268
12893	DEU09.028	49.0078	12.1788	Germany	Theodoxus fluviatilis s.l.	Theodoxus fluviatilis	Sands et al. 2019a	MK754608	MK754950	MK755271
12898	DEU09.056	49.8644	8.35262	Germany	Theodoxus fluviatilis s.l.	Theodoxus fluviatilis	Sands et al. 2019a	MK754609	MK754951	MK755272
12899	AUT09.005	48.3513	16.279	Austria	Theodoxus fluviatilis s.l.	Theodoxus fluviatilis	Sands et al. 2019a	MK754610	MK754952	MK755273
12900	UKR09.010	47.057	31.8566	Ukraine	Theodoxus fluviatilis s.l.	Theodoxus fluviatilis	Sands et al. 2019a	MK754611	MK754953	MK755274
14168	RM10.095	42.017	1.48432	Spain	Theodoxus fluviatilis s.l.	Theodoxus fluviatilis	Sands et al. 2019a	MK754612	na	MK755276
14170	RM10.096	43.758	3.235	France	Theodoxus fluviatilis s.l.	Theodoxus fluviatilis	Sands et al. 2019a	MK754613	MK754955	MK755277
14183	RM10.104	42.829	2.916	France	Theodoxus fluviatilis s.l.	Theodoxus fluviatilis	Sands et al. 2019a	MK754614	na	MK755278
14441	RM09.205	38.3975	38.4067	Turkey	Theodoxus fluviatilis s.l.	Theodoxus fluviatilis	Sands et al. 2019a	MK754618	MK754959	MK755282
14445	RM10.137	42.8378	-2.92289	France	Theodoxus fluviatilis s.l.	Theodoxus fluviatilis	Sands et al. 2019a	MK754620	MK754961	MK755283
14921	RM10.157	38.1842	29.8832	Turkey	Theodoxus cf. heldreichi	Theodoxus fluviatilis	Sands et al. 2019a	MK754621	MK754962	MK755284
14923	RM10.158	37.5409	31.4919	Turkey	Theodoxus cf. heldreichi	Theodoxus fluviatilis	Sands et al. 2019a	MK754622	MK754963	MK755285
14961	RM10.186	38.1814	37.2198	Turkey	Theodoxus cf. heldreichi	Theodoxus fluviatilis	Sands et al. 2019a	MK754647	MK754988	MK755310
14964	RM10.188	40.8365	30.4675	Turkey	Theodoxus fluviatilis s.l.	Theodoxus fluviatilis	Sands et al. 2019a	MK754648	MK754989	na
14966	RM10.190	40.452	29.261	Turkey	Theodoxus fluviatilis s.l.	Theodoxus fluviatilis	Sands et al. 2019a	MK754649	MK754990	na
15333	RM11.025	37.912	31.4932	Turkey	Theodoxus cf. heldreichi	Theodoxus fluviatilis	Sands et al. 2019a	MK754650	MK754991	MK755311
15341	RM11.046	41.0793	24.7583	Greece	Theodoxus fluviatilis s.l.	Theodoxus fluviatilis	Sands et al. 2019a	MK754651	MK754992	MK755312
15349	RM11.022	41.1877	-1.88301	Spain	Theodoxus fluviatilis s.l.	Theodoxus fluviatilis	Sands et al. 2019a	MK754652	na	na
17745	RM12.025	39.8875	26.2639	Turkey	Theodoxus fluviatilis s.l.	Theodoxus fluviatilis	Sands et al. 2019a	MK754653	MK754993	MK755313
20310	UGSB13098	51.5072	-0.1275	United Kingdom	Theodoxus fluviatilis s.l.	Theodoxus fluviatilis	Sands et al. 2019a	MK754668	MK755008	MK755326
23371	UGSB18333	46.4871	32.1937	Ukraine	Theodoxus cf. sarmaticus	Theodoxus fluviatilis	Sands et al. 2019a	MK754673	MK755012	MK755329
23388	UGSB18136	43.0918	40.8145	Georgia	Theodoxus subthermalis	Theodoxus fluviatilis	Sands et al. 2019a	MK754686	MK755025	MK755342
23390	UGSB18138	43.0918	40.8145	Georgia	Theodoxus subthermalis	Theodoxus fluviatilis	Sands et al. 2019a	MK754687	MK755026	MK755343
23391	UGSB18139	42.2701	42.735	Georgia	Theodoxus subthermalis	Theodoxus fluviatilis	Sands et al. 2019a	MK754688	MK755027	MK755344
23392	UGSB18140	42.2701	42.735	Georgia	Theodoxus subthermalis	Theodoxus fluviatilis	Sands et al. 2019a	MK754689	MK755028	MK755345
23393	UGSB18141	42.2701	42.735	Georgia	Theodoxus subthermalis	Theodoxus fluviatilis	Sands et al. 2019a	MK754690	MK755029	MK755346
23397	UGSB18145	60.0448	29.9597	Russia	Theodoxus fluviatilis s.l.	Theodoxus fluviatilis	Sands et al. 2019a	MK754694	MK755033	MK755350
23398	UGSB18146	60.0448	29.9597	Russia	Theodoxus fluviatilis s.l.	Theodoxus fluviatilis	Sands et al. 2019a	MK754695	MK755034	MK755351
23399	UGSB18147	60.0448	29.9597	Russia	Theodoxus fluviatilis s.l.	Theodoxus fluviatilis	Sands et al. 2019a	MK754696	MK755035	MK755352
23406	UGSB18154	44.6997	37.5965	Russia	Theodoxus cf. danasteri	Theodoxus fluviatilis	Sands et al. 2019a	MK754700	MK755039	MK755356
23407	UGSB18155	44.6997	37.5965	Russia	Theodoxus cf. danasteri	Theodoxus fluviatilis	Sands et al. 2019a	MK754701	MK755040	MK755357
23408	UGSB18156	44.6997	37.5965	Russia	Theodoxus cf. danasteri	Theodoxus fluviatilis	Sands et al. 2019a	MK754702	MK755041	MK755358
23409	UGSB18157	46.217	30.4267	Ukraine	Theodoxus cf. danasteri	Theodoxus fluviatilis	Sands et al. 2019a	MK754703	MK755042	na
23410	UGSB18158	46.217	30.4267	Ukraine	Theodoxus cf. euxinus	Theodoxus fluviatilis	Sands et al. 2019a	MK754704	MK755043	na
23411	UGSB18159	46.217	30.4267	Ukraine	Theodoxus cf. euxinus	Theodoxus fluviatilis	Sands et al. 2019a	MK754705	MK755044	na
23413	UGSB18161	50.5606	30.5597	Ukraine	Theodoxus cf. sarmaticus	Theodoxus fluviatilis	Sands et al. 2019a	MK754707	MK755046	MK755360
23415	UGSB18163	48.7616	25.6126	Ukraine	Theodoxus fluviatilis s.l.	Theodoxus fluviatilis	Sands et al. 2019a	MK754709	MK755048	MK755362
23416	UGSB18164	48.7616	25.6126	Ukraine	Theodoxus fluviatilis s.l.	Theodoxus fluviatilis	Sands et al. 2019a	MK754710	MK755049	MK755363
23417	UGSB18165	48.7616	25.6126	Ukraine	Theodoxus fluviatilis s.l.	Theodoxus fluviatilis	Sands et al. 2019a	MK754711	MK755050	MK755364
23418	UGSB18166	48.7084	24.3876	Ukraine	Theodoxus fluviatilis s.l.	Theodoxus fluviatilis	Sands et al. 2019a	MK754712	MK755051	MK755365
23419	UGSB18167	48.7084	24.3876	Ukraine	Theodoxus fluviatilis s.l.	Theodoxus fluviatilis	Sands et al. 2019a	MK754713	MK755052	MK755366
23421	UGSB18169	49.1283	24.7237	Ukraine	Theodoxus fluviatilis s.l.	Theodoxus fluviatilis	Sands et al. 2019a	MK754714	MK755053	MK755367
23422	UGSB18170	49.1283	24.7237	Ukraine	Theodoxus fluviatilis s.l.	Theodoxus fluviatilis	Sands et al. 2019a	MK754715	MK755054	MK755368
23423	UGSB18171	49.1283	24.7237	Ukraine	Theodoxus fluviatilis s.l.	Theodoxus fluviatilis	Sands et al. 2019a	MK754716	MK755055	MK755369
23436	UGSB18092	32.3258	-6.33697	Morocco	Theodoxus fluviatilis s.l.	Theodoxus fluviatilis	Sands et al. 2019a	MK754726	MK755065	MK755379
23437	UGSB18093	32.3258	-6.33697	Morocco	Theodoxus fluviatilis s.l.	Theodoxus fluviatilis	Sands et al. 2019a	MK754727	MK755066	MK755380
23438	UGSB18094	32.3258	-6.33697	Morocco	Theodoxus fluviatilis s.l.	Theodoxus fluviatilis	Sands et al. 2019a	MK754728	MK755067	MK755381
23448	UGSB18104	32.1059	-7.0434	Morocco	Theodoxus fluviatilis s.l.	Theodoxus fluviatilis	Sands et al. 2019a	MK754736	MK755075	MK755385
23449	UGSB18105	32.1059	-7.0434	Morocco	Theodoxus fluviatilis s.l.	Theodoxus fluviatilis	Sands et al. 2019a	MK754737	MK755076	MK755386
23450	UGSB18106	32.1059	-7.0434	Morocco	Theodoxus fluviatilis s.l.	Theodoxus fluviatilis	Sands et al. 2019a	MK754738	MK755077	MK755387
23532	UGSB18417	46.3324	30.1013	Ukraine	Theodoxus cf. danasteri	Theodoxus fluviatilis	Sands et al. 2019a	MK754748	MK755087	MK755397
23533	UGSB18418	46.3324	30.1013	Ukraine	Theodoxus fluviatilis s.l.	Theodoxus fluviatilis	Sands et al. 2019a	MK754749	MK755088	MK755398
23534	UGSB18419	45.4985	28.9647	Ukraine	Theodoxus fluviatilis s.l.	Theodoxus fluviatilis	Sands et al. 2019a	MK754750	MK755089	MK755399
23535	UGSB18420	45.4985	28.9647	Ukraine	Theodoxus fluviatilis s.l.	Theodoxus fluviatilis	Sands et al. 2019a	MK754751	MK755090	MK755400
23537	UGSB18422	45.5162	28.5888	Ukraine	Theodoxus fluviatilis s.l.	Theodoxus fluviatilis	Sands et al. 2019a	MK754752	MK755091	MK755401
23538	UGSB18423	45.5162	28.5888	Ukraine	Theodoxus fluviatilis s.l.	Theodoxus fluviatilis	Sands et al. 2019a	MK754753	MK755092	MK755402
23539	UGSB18424	45.5162	28.5888	Ukraine	Theodoxus fluviatilis s.l.	Theodoxus fluviatilis	Sands et al. 2019a	MK754754	MK755093	MK755403
23540	UGSB18425	46.1814	30.4366	Ukraine	Theodoxus fluviatilis s.l.	Theodoxus fluviatilis	Sands et al. 2019a	MK754755	MK755094	MK755404
23541	UGSB18426	46.1814	30.4366	Ukraine	Theodoxus fluviatilis s.l.	Theodoxus fluviatilis	Sands et al. 2019a	MK754756	MK755095	MK755405
23544	UGSB18429	43.5317	39.8872	Russia	Theodoxus fluviatilis s.l.	Theodoxus fluviatilis	Sands et al. 2019a	MK754759	MK755098	MK755408
23545	UGSB18430	42.3017	42.5008	Georgia	Theodoxus fluviatilis s.l.	Theodoxus fluviatilis	Sands et al. 2019a	MK754760	MK755099	MK755409
23547	UGSB18432	46.5654	32.1593	Ukraine	Theodoxus fluviatilis s.l.	Theodoxus fluviatilis	Sands et al. 2019a	MK754761	MK755100	MK755410
23548	UGSB18433	43.0305	41.0763	Georgia	Theodoxus fluviatilis s.l.	Theodoxus fluviatilis	Sands et al. 2019a	MK754762	MK755101	MK755411
23549	UGSB18434	44.6932	28.949	Romania	Theodoxus cf. euxinus	Theodoxus fluviatilis	Sands et al. 2019a	MK754763	MK755102	MK755412
23550	UGSB18435	44.6932	28.949	Romania	Theodoxus cf. euxinus	Theodoxus fluviatilis	Sands et al. 2019a	MK754764	MK755103	MK755413
23905	RM10.097	47.348	1.244	France	Theodoxus fluviatilis s.l.	Theodoxus fluviatilis	Sands et al. 2019a	na	MK755115	MK755423
23914	RM10.097	47.348	1.244	France	Theodoxus fluviatilis s.l.	Theodoxus fluviatilis	Sands et al. 2019a	MK754776	MK755120	MK755428
23915	RM10.098	41.813	8.962	France	Theodoxus fluviatilis s.l.	Theodoxus fluviatilis	Sands et al. 2019a	MK754777	MK755121	MK755429
23916	RM10.098	41.813	8.962	France	Theodoxus fluviatilis s.l.	Theodoxus fluviatilis	Sands et al. 2019a	MK754778	MK755122	MK755430
23922	RM10.106	40.302	9.514	Italy	Theodoxus fluviatilis s.l.	Theodoxus fluviatilis	Sands et al. 2019a	MK754779	MK755123	MK755431
23923	RM10.106	40.302	9.514	Italy	Theodoxus fluviatilis s.l.	Theodoxus fluviatilis	Sands et al. 2019a	MK754780	MK755124	MK755432
23930	RM07.485	39.5578	21.7601	Greece	Theodoxus fluviatilis s.l.	Theodoxus fluviatilis	Sands et al. 2019a	MK754781	MK755125	MK755433
23931	RM07.485	39.5578	21.7601	Greece	Theodoxus fluviatilis s.l.	Theodoxus fluviatilis	Sands et al. 2019a	MK754782	MK755126	MK755434
24158	UGSB19183	44.6997	37.5965	Russia	Theodoxus cf. danasteri	Theodoxus fluviatilis	Sands et al. 2019a	MK754793	MK755137	MK755445
24159	UGSB19184	44.6997	37.5965	Russia	Theodoxus cf. danasteri	Theodoxus fluviatilis	Sands et al. 2019a	MK754794	MK755138	MK755446
24170	UGSB19142	38.1866	-1.04872	Spain	Theodoxus fluviatilis s.l.	Theodoxus fluviatilis	Sands et al. 2019a	MK754801	MK755145	MK755450
24171	UGSB19144	42.2108	19.1833	Montenegro	Theodoxus cf. danasteri	Theodoxus fluviatilis	Sands et al. 2019a	MK754802	MK755146	na
24179	UGSB19159	42.2108	19.1833	Montenegro	Theodoxus cf. danasteri	Theodoxus fluviatilis	Sands et al. 2019a	MK754809	MK755153	na
24184	UGSB19185	38.874	-0.0833333	Spain	Theodoxus fluviatilis s.l.	Theodoxus fluviatilis	Sands et al. 2019a	MK754814	MK755158	MK755455
24838	UGSB20425	38.3975	38.4067	Turkey	Theodoxus fluviatilis s.l.	Theodoxus fluviatilis	Sequenced for this study	MN657520	MN650265	na
24839	UGSB20426	38.3975	38.4067	Turkey	Theodoxus fluviatilis s.l.	Theodoxus fluviatilis	Sequenced for this study	MN657521	MN650266	na
24840	UGSB20427	38.3975	38.4067	Turkey	Theodoxus fluviatilis s.l.	Theodoxus fluviatilis	Sequenced for this study	MN657522	MN650267	na
24928	UGSB20515	38.212075	30.7525	Turkey	Theodoxus heldreichi	Theodoxus fluviatilis	Sequenced for this study	MN657525	MN650270	na
24932	UGSB20519	35.4343	24.1272	Greece	Theodoxus saulcyi	Theodoxus fluviatilis	Sequenced for this study	MN657526	MN650271	na
24933	UGSB20520	40.9874	22.5587	Greece	Theodoxus fluviatilis s.l.	Theodoxus fluviatilis	Sequenced for this study	MN657527	MN650272	na
24934	UGSB20521	43.0909	40.8159	Georgia	Theodoxus subthermalis	Theodoxus fluviatilis	Sequenced for this study	MN657528	MN650273	na
24935	UGSB20522	38.1755	30.7552	Turkey	Theodoxus heldreichi	Theodoxus fluviatilis	Sequenced for this study	MN657529	MN650274	na
24936	UGSB20523	38.1755	30.7552	Turkey	Theodoxus heldreichi	Theodoxus fluviatilis	Sequenced for this study	MN657530	MN650275	na
25257	UGSB20747	38.05639722	30.1756	Turkey	Theodoxus heldreichi	Theodoxus fluviatilis	Sequenced for this study	MN657551	MN650296	MN657492
25258	UGSB20748	38.05639722	30.1756	Turkey	Theodoxus heldreichi	Theodoxus fluviatilis	Sequenced for this study	MN657552	MN650297	MN657493
25261	UGSB20751	39.6135	27.9624	Turkey	Theodoxus fluviatilis s.l.	Theodoxus fluviatilis	Sequenced for this study	MN657553	MN650298	na
25262	UGSB20752	39.6135	27.9624	Turkey	Theodoxus fluviatilis s.l.	Theodoxus fluviatilis	Sequenced for this study	MN657554	MN650299	na
25267	UGSB20757	39.5961	27.9554	Turkey	Theodoxus fluviatilis s.l.	Theodoxus fluviatilis	Sequenced for this study	MN657556	MN650301	MN657495
25268	UGSB20758	39.5961	27.9554	Turkey	Theodoxus fluviatilis s.l.	Theodoxus fluviatilis	Sequenced for this study	MN657557	MN650302	MN657496
25269	UGSB20759	37.8166	31.779	Turkey	Theodoxus heldreichi	Theodoxus fluviatilis	Sequenced for this study	MN657558	MN650303	MN657497
25271	UGSB20761	40.45070278	29.2589	Turkey	Theodoxus fluviatilis s.l.	Theodoxus fluviatilis	Sequenced for this study	MN657559	MN650304	na
25272	UGSB20762	40.45070279	30.2589	Turkey	Theodoxus fluviatilis s.l.	Theodoxus fluviatilis	Sequenced for this study	MN657560	MN650305	na
25280	UGSB20770	39.416632	28.1007	Turkey	Theodoxus fluviatilis s.l.	Theodoxus fluviatilis	Sequenced for this study	MN657561	MN650306	na
25288	UGSB20778	40.208	28.4309	Turkey	Theodoxus fluviatilis s.l.	Theodoxus fluviatilis	Sequenced for this study	MN657559	MN650309	na
25289	UGSB20779	38.3975	38.4067	Turkey	Theodoxus fluviatilis s.l.	Theodoxus fluviatilis	Sequenced for this study	MN657564	MN650310	na
25290	UGSB20780	38.3975	38.4067	Turkey	Theodoxus fluviatilis s.l.	Theodoxus fluviatilis	Sequenced for this study	MN657565	MN650311	na
25292	UGSB20784	37.8826	30.866	Turkey	Theodoxus heldreichi	Theodoxus fluviatilis	Sequenced for this study	MN657566	MN650312	na
25533	UGSB21200	39.5961	27.9554	Turkey	Theodoxus fluviatilis s.l.	Theodoxus fluviatilis	Sequenced for this study	MN657567	MN650313	na
TF009	na	48.4312	7.67587	France	Theodoxus fluviatilis s.l.	Theodoxus fluviatilis	Bunje and Lindberg 2007	AY765306	AY771240	na
TF155	na	54.1469	10.3442	Germany	Theodoxus fluviatilis s.l.	Theodoxus fluviatilis	Bunje and Lindberg 2007	AY765308	AY771240	na
TF225	na	53.0966	12.8923	Germany	Theodoxus fluviatilis s.l.	Theodoxus fluviatilis	Bunje and Lindberg 2007	AY765317	AY771241	na
TF251	na	45.5724	10.7091	Italy	Theodoxus fluviatilis s.l.	Theodoxus fluviatilis	Bunje and Lindberg 2007	AY765319	AY771240	na
TF295	na	45.2547	10.6765	Italy	Theodoxus fluviatilis s.l.	Theodoxus fluviatilis	Bunje and Lindberg 2007	AY765325	AY771242	na
TF328	na	42.9912	10.9049	Italy	Theodoxus fluviatilis s.l.	Theodoxus fluviatilis	Bunje and Lindberg 2007	AY765328	AY771243	na
TF350	na	60.0925	19.7817	Finland	Theodoxus fluviatilis s.l.	Theodoxus fluviatilis	Bunje and Lindberg 2007	AY765318	AY771240	na
TF396	na	54.345	13.507	Germany	Theodoxus fluviatilis s.l.	Theodoxus fluviatilis	Bunje and Lindberg 2007	AY765308	AY771245	na
TF417	na	53.0563	-8.41105	Ireland	Theodoxus fluviatilis s.l.	Theodoxus fluviatilis	Bunje and Lindberg 2007	AY765330	AY771240	na
TF418	na	52.2703	-6.99463	Ireland	Theodoxus fluviatilis s.l.	Theodoxus fluviatilis	Bunje and Lindberg 2007	AY765308	AY771246	na
TF426	na	46.6943	0.557152	France	Theodoxus fluviatilis s.l.	Theodoxus fluviatilis	Bunje and Lindberg 2007	AY765331	AY771247	na
TZ010	na	39.1362	-0.52517	Spain	Theodoxus velascoi *(potentially misidentified)	Theodoxus fluviatilis	Bunje and Lindberg 2007	na	AY771261	na
11421	RM09.72	38.2483	27.2812	Turkey	Theodoxus gurur sp. nov.	Theodoxus gurur sp. nov.	Sands et al. 2019a	MK754593	MK754935	MK755256
24166	UGSB19138	38.2483	27.2812	Turkey	Theodoxus gurur sp. nov.	Theodoxus gurur sp. nov.	Sands et al. 2019a	MK754798	MK755142	MK755448
24177	UGSB19156	38.2483	27.2812	Turkey	Theodoxus gurur sp. nov.	Theodoxus gurur sp. nov.	Sands et al. 2019a	MK754807	MK755151	MK755452
25255	UGSB20745	38.2483	27.2812	Turkey	Theodoxus gurur sp. nov.	Theodoxus gurur sp. nov.	Sequenced for this study	MN657549	MN650294	MN657490
25256	UGSB20746	38.2483	27.2812	Turkey	Theodoxus gurur sp. nov.	Theodoxus gurur sp. nov.	Sequenced for this study	MN657550	MN650295	MN657491
7919	RM06.128	36.8695	27.1333	Greece	Theodoxus jordani	Theodoxus jordani	Sands et al. 2019a	MK754501	MK754843	na
7920	RM07.40	30.5747	47.7459	Iraq	Theodoxus jordani	Theodoxus jordani	Sands et al. 2019a	MK754502	MK754844	na
7921	RM07.40	30.5747	47.7459	Iraq	Theodoxus jordani	Theodoxus jordani	Sands et al. 2019a	MK754503	MK754845	na
7922	RM06.237	34.3517	36.3767	Lebanon	Theodoxus jordani	Theodoxus jordani	Sands et al. 2019a	MK754504	MK754846	MK755183
7923	RM06.237	34.3517	36.3767	Lebanon	Theodoxus jordani	Theodoxus jordani	Sands et al. 2019a	MK754505	MK754847	MK755184
11394	RM09.56	36.8516	30.7834	Turkey	Theodoxus jordani	Theodoxus jordani	Sands et al. 2019a	MK754577	MK754919	MK755242
11395	RM09.56	36.8516	30.7834	Turkey	Theodoxus jordani	Theodoxus jordani	Sands et al. 2019a	MK754578	MK754920	MK755243
12882	UGSB24178	30.0051	31.226	Egypt	Theodoxus niloticus	Theodoxus jordani	Sands et al. 2019a	MK754598	MK754940	MK755261
14925	RM10.159	37.0157	35.3275	Turkey	Theodoxus jordani	Theodoxus jordani	Sands et al. 2019a	MK754623	MK754964	MK755286
14928	RM10.161	36.1292	35.9721	Turkey	Theodoxus jordani	Theodoxus jordani	Sands et al. 2019a	MK754625	MK754966	MK755288
14932	UGSB24175	36.2528	36.245	Turkey	Theodoxus jordani	Theodoxus jordani	Sands et al. 2019a	MK754627	MK754968	MK755290
14933	RM10.163	36.2528	36.245	Turkey	Theodoxus jordani	Theodoxus jordani	Sands et al. 2019a	MK754628	MK754969	MK755291
14945	UGSB24176	37.349	38.9676	Turkey	Theodoxus jordani	Theodoxus jordani	Sands et al. 2019a	MK754633	MK754974	MK755296
17746	RM12.028	37.1477	38.7862	Turkey	Theodoxus jordani	Theodoxus jordani	Sands et al. 2019a	MK754654	MK754994	MK755314
17747	RM12.031	37.0189	36.6965	Turkey	Theodoxus jordani	Theodoxus jordani	Sands et al. 2019a	MK754655	MK754995	MK755315
17748	RM12.040	36.621	29.1088	Turkey	Theodoxus jordani	Theodoxus jordani	Sands et al. 2019a	MK754656	MK754996	MK755316
17759	UGSB24177	32.7104	35.5761	Israel	Theodoxus jordani	Theodoxus jordani	Sands et al. 2019a	MK754657	MK754997	MK755317
17760	ISR11.002	32.7109	35.5714	Israel	Theodoxus jordani	Theodoxus jordani	Sands et al. 2019a	MK754658	MK754998	MK755318
17762	ISR11.003	32.8451	35.5249	Israel	Theodoxus jordani	Theodoxus jordani	Sands et al. 2019a	MK754659	MK754999	MK755319
23373	UGSB18317	35.0565	32.346	Cyprus	Theodoxus jordani	Theodoxus jordani	Sands et al. 2019a	MK754674	MK755013	MK755330
23374	UGSB18318	35.0565	32.346	Cyprus	Theodoxus jordani	Theodoxus jordani	Sands et al. 2019a	MK754675	MK755014	MK755331
23375	UGSB18319	35.0565	32.346	Cyprus	Theodoxus jordani	Theodoxus jordani	Sands et al. 2019a	MK754676	MK755015	MK755332
23376	UGSB18320	34.9203	32.3381	Cyprus	Theodoxus jordani	Theodoxus jordani	Sands et al. 2019a	MK754677	MK755016	MK755333
23377	UGSB18321	34.9203	32.3381	Cyprus	Theodoxus jordani	Theodoxus jordani	Sands et al. 2019a	MK754678	MK755017	MK755334
23378	UGSB18322	34.9203	32.3381	Cyprus	Theodoxus jordani	Theodoxus jordani	Sands et al. 2019a	MK754679	MK755018	MK755335
23379	UGSB18323	35.024	32.3414	Cyprus	Theodoxus jordani	Theodoxus jordani	Sands et al. 2019a	MK754680	MK755019	MK755336
23380	UGSB18324	35.024	32.3414	Cyprus	Theodoxus jordani	Theodoxus jordani	Sands et al. 2019a	MK754681	MK755020	MK755337
23381	UGSB18325	35.024	32.3414	Cyprus	Theodoxus jordani	Theodoxus jordani	Sands et al. 2019a	MK754682	MK755021	MK755338
25265	UGSB20755	36.249038	36.3542	Turkey	Theodoxus jordani	Theodoxus jordani	Sequenced for this study	MN657555	MN650300	MN657494
25282	UGSB20772	36.313740	34.0335	Turkey	Theodoxus jordani	Theodoxus jordani	Sequenced for this study	MN657562	MN650307	na
25287	UGSB20777	36.95723889	35.6253	Turkey	Theodoxus jordani	Theodoxus jordani	Sequenced for this study	MN657563	MN650308	na
26012	UGSB21680	31.3075	48.669	Iran	Theodoxus euphraticus	Theodoxus jordani	Sequenced for this study	MN657568	MN650314	MN657498
26039	UGSB21707	29.3139	51.8699	Iran	Theodoxus euphraticus	Theodoxus jordani	Sequenced for this study	MN657572	MN650318	MN657502
26437	UGSB22236	29.798	51.5691	Iran	Theodoxus euphraticus	Theodoxus jordani	Sequenced for this study	MN657585	MN650331	MN657514
26438	UGSB22237	29.798	51.5691	Iran	Theodoxus euphraticus	Theodoxus jordani	Sequenced for this study	MN657586	MN650332	MN657515
26449	UGSB22248	29.78	51.5827	Iran	Theodoxus euphraticus	Theodoxus jordani	Sequenced for this study	MN657587	MN650333	MN657516
26450	UGSB22249	29.78	51.5827	Iran	Theodoxus euphraticus	Theodoxus jordani	Sequenced for this study	MN657588	MN650334	MN657517
27047	UGSB23426	37.1475	38.7845	Turkey	Theodoxus mesopotamicus	Theodoxus jordani	Sequenced for this study	MN657589	MN650335	MN657518
27048	UGSB23427	37.1475	38.7845	Turkey	Theodoxus mesopotamicus	Theodoxus jordani	Sequenced for this study	MN657590	MN650336	MN657519
14927	UGSB24179	36.1286	36.1435	Turkey	Theodoxus cf. macri	Theodoxus macri	Sands et al. 2019a	MK754624	MK754965	MK755287
14930	RM10.162	36.0165	35.9874	Turkey	Theodoxus cf. macri	Theodoxus macri	Sands et al. 2019a	MK754626	MK754967	MK755289
14934	UGSB24180	36.2361	36.5688	Turkey	Theodoxus cf. macri	Theodoxus macri	Sands et al. 2019a	MK754629	MK754970	MK755292
14936	UGSB24181	36.5031	36.4979	Turkey	Theodoxus cf. macri	Theodoxus macri	Sands et al. 2019a	MK754630	MK754971	MK755293
14941	RM10.169	37.5095	36.8975	Turkey	Theodoxus cf. macri	Theodoxus macri	Sands et al. 2019a	MK754631	MK754972	MK755294
14942	RM10.170	37.25	37.8706	Turkey	Theodoxus cf. macri	Theodoxus macri	Sands et al. 2019a	MK754632	MK754973	MK755295
8889	RM07.80	46.3355	48.1206	Russia	Theodoxus astrachanicus	Theodoxus major	Sands et al. 2019a	MK754516	MK754858	MK755195
8890	RM07.80	46.3355	48.1206	Russia	Theodoxus astrachanicus	Theodoxus major	Sands et al. 2019a	MK754517	MK754859	MK755196
8891	RM07.80	46.3355	48.1206	Russia	Theodoxus astrachanicus	Theodoxus major	Sands et al. 2019a	MK754518	MK754860	MK755197
9120	PC08-04	40.1429	44.1712	Armenia	Theodoxus schirazensis var. major	Theodoxus major	Sands et al. 2019a	MK754532	MK754874	MK755206
9122	PC08-04	40.1429	44.1712	Armenia	Theodoxus schirazensis var. major	Theodoxus major	Sands et al. 2019a	MK754533	MK754875	MK755207
9123	PC08-05	40.1416	44.1712	Armenia	Theodoxus schirazensis var. major	Theodoxus major	Sands et al. 2019a	MK754534	MK754876	MK755208
9124	PC08-27	40.1663	44.4853	Armenia	Theodoxus schirazensis var. major	Theodoxus major	Sands et al. 2019a	MK754535	MK754877	MK755209
9125	PC08-27	40.1663	44.4853	Armenia	Theodoxus schirazensis var. major	Theodoxus major	Sands et al. 2019a	MK754536	MK754878	MK755210
9126	PC08-27	40.1663	44.4853	Armenia	Theodoxus schirazensis var. major	Theodoxus major	Sands et al. 2019a	MK754537	MK754879	MK755211
10641	RM08.172	43.5824	51.2502	Kazakhstan	Theodoxus pallasi	Theodoxus major	Sands et al. 2019a	MK754568	MK754910	MK755238
10643	RM08.172	43.5824	51.2502	Kazakhstan	Theodoxus pallasi	Theodoxus major	Sands et al. 2019a	MK754569	MK754911	MK755239
14165	RM10.093	37.4846	57.4361	Iran	Theodoxus aff. schirazensis var. major	Theodoxus major	Sands et al. 2019a	na	MK754954	MK755275
23382	UGSB18302	40.7803	49.5497	Azerbaijan	Theodoxus pallasi	Theodoxus major	Sands et al. 2019a	MK754683	MK755022	MK755339
23383	UGSB18303	40.7803	49.5497	Azerbaijan	Theodoxus pallasi	Theodoxus major	Sands et al. 2019a	MK754684	MK755023	MK755340
23384	UGSB18304	40.7803	49.5497	Azerbaijan	Theodoxus pallasi	Theodoxus major	Sands et al. 2019a	MK754685	MK755024	MK755341
23394	UGSB18142	40.4893	50.3304	Azerbaijan	Theodoxus pallasi	Theodoxus major	Sands et al. 2019a	MK754691	MK755030	MK755347
23395	UGSB18143	40.4893	50.3304	Azerbaijan	Theodoxus pallasi	Theodoxus major	Sands et al. 2019a	MK754692	MK755031	MK755348
23396	UGSB18144	40.4893	50.3304	Azerbaijan	Theodoxus pallasi	Theodoxus major	Sands et al. 2019a	MK754693	MK755032	MK755349
23400	UGSB18148	47.185	39.6298	Russia	Theodoxus astrachanicus	Theodoxus major	Sands et al. 2019a	MK754697	MK755036	MK755353
23403	UGSB18151	47.185	39.6298	Russia	Theodoxus astrachanicus	Theodoxus major	Sands et al. 2019a	MK754698	MK755037	MK755354
23405	UGSB18153	47.185	39.6298	Russia	Theodoxus astrachanicus	Theodoxus major	Sands et al. 2019a	MK754699	MK755038	MK755355
23425	UGSB18173	46.3522	35.2656	Ukraine	Theodoxus astrachanicus	Theodoxus major	Sands et al. 2019a	MK754717	MK755056	MK755370
23426	UGSB18174	46.15	35.0487	Ukraine	Theodoxus astrachanicus	Theodoxus major	Sands et al. 2019a	MK754718	MK755057	MK755371
23427	UGSB18175	46.15	35.0487	Ukraine	Theodoxus astrachanicus	Theodoxus major	Sands et al. 2019a	MK754719	MK755058	MK755372
23428	UGSB18176	46.15	35.0487	Ukraine	Theodoxus astrachanicus	Theodoxus major	Sands et al. 2019a	MK754720	MK755059	MK755373
23430	UGSB18178	46.2857	35.2908	Ukraine	Theodoxus astrachanicus	Theodoxus major	Sands et al. 2019a	MK754721	MK755060	MK755374
23431	UGSB18179	46.2857	35.2908	Ukraine	Theodoxus astrachanicus	Theodoxus major	Sands et al. 2019a	MK754722	MK755061	MK755375
23433	UGSB18089	36.584867	51.7681	Iran	Theodoxus pallasi	Theodoxus major	Sands et al. 2019a	MK754724	MK755063	MK755377
23434	UGSB18090	36.584867	51.7681	Iran	Theodoxus pallasi	Theodoxus major	Sands et al. 2019b	MN168591	MN174970	MN180461
23435	UGSB18091	36.584867	51.7681	Iran	Theodoxus pallasi	Theodoxus major	Sands et al. 2019a	MK754725	MK755064	MK755378
23542	UGSB18427	46.3028	49.0439	Russia	Theodoxus astrachanicus	Theodoxus major	Sands et al. 2019a	MK754757	MK755096	MK755406
23543	UGSB18428	46.3028	49.0439	Russia	Theodoxus astrachanicus	Theodoxus major	Sands et al. 2019a	MK754758	MK755097	MK755407
23554	UGSB18440	36.584867	51.7681	Iran	Theodoxus pallasi	Theodoxus major	Sands et al. 2019b	MN168592	MN174971	MN180462
23555	UGSB18440	36.584867	51.7681	Iran	Theodoxus pallasi	Theodoxus major	Sands et al. 2019a	MK754766	MK755105	MK755415
23895	UGSB18757	45.1218	47.6821	Russia	Theodoxus pallasi	Theodoxus major	Sands et al. 2019a	MK754773	MK755112	MK755420
23896	UGSB18758	45.1218	47.6821	Russia	Theodoxus pallasi	Theodoxus major	Sands et al. 2019a	MK754774	MK755113	MK755421
23897	UGSB18759	45.1218	47.6821	Russia	Theodoxus pallasi	Theodoxus major	Sands et al. 2019a	MK754775	MK755114	MK755422
23909	RM10.092	37.333	57.668	Iran	Theodoxus aff. schirazensis var. major	Theodoxus major	Sands et al. 2019a	na	MK755116	MK755424
23910	RM10.092	37.333	57.668	Iran	Theodoxus aff. schirazensis var. major	Theodoxus major	Sands et al. 2019a	na	MK755117	MK755425
23911	RM10.093	37.417	57.4	Iran	Theodoxus aff. schirazensis var. major	Theodoxus major	Sands et al. 2019a	na	MK755118	MK755426
23913	RM10.094	36.583	59.75	Iran	Theodoxus aff. schirazensis var. major	Theodoxus major	Sands et al. 2019a	na	MK755119	MK755427
24138	UGSB19149	43.5824	51.2502	Kazakhstan	Theodoxus pallasi	Theodoxus major	Sands et al. 2019a	MK754783	MK755127	MK755435
24142	UGSB19161	43.5824	51.2502	Kazakhstan	Theodoxus pallasi	Theodoxus major	Sands et al. 2019a	MK754784	MK755128	MK755436
24145	UGSB19168	43.5824	51.2502	Kazakhstan	Theodoxus pallasi	Theodoxus major	Sands et al. 2019a	MK754785	MK755129	MK755437
24147	UGSB19175	43.6293	51.1689	Kazakhstan	Theodoxus pallasi	Theodoxus major	Sands et al. 2019a	MK754786	MK755130	MK755438
24148	UGSB19176	43.1769	51.6636	Kazakhstan	Theodoxus pallasi	Theodoxus major	Sands et al. 2019a	MK754787	MK755131	MK755439
24149	UGSB19177	43.4677	51.3106	Kazakhstan	Theodoxus pallasi	Theodoxus major	Sands et al. 2019a	MK754788	MK755132	MK755440
24150	UGSB19178	43.6293	51.1689	Kazakhstan	Theodoxus pallasi	Theodoxus major	Sands et al. 2019a	MK754789	MK755133	MK755441
24151	UGSB19179	43.1769	51.6636	Kazakhstan	Theodoxus pallasi	Theodoxus major	Sands et al. 2019a	MK754790	MK755134	MK755442
24152	UGSB19180	43.4677	51.3106	Kazakhstan	Theodoxus pallasi	Theodoxus major	Sands et al. 2019a	MK754791	MK755135	MK755443
24153	UGSB19181	43.6293	51.1689	Kazakhstan	Theodoxus pallasi	Theodoxus major	Sands et al. 2019a	MK754792	MK755136	MK755444
24794	UGSB20381	40.4893	50.3304	Azerbaijan	Theodoxus pallasi	Theodoxus major	Sands et al. 2019b	MN1685569	MN174948	MN180439
24795	UGSB20382	40.4893	50.3304	Azerbaijan	Theodoxus pallasi	Theodoxus major	Sands et al. 2019b	MN1685570	MN174949	MN180440
24801	UGSB20388	46.15	35.0487	Ukraine	Theodoxus astrachanicus	Theodoxus major	Sands et al. 2019b	MN168743	MN175122	MN180613
24802	UGSB20389	46.15	35.0487	Ukraine	Theodoxus astrachanicus	Theodoxus major	Sands et al. 2019b	MN168744	MN175123	MN180614
24803	UGSB20390	46.15	35.0487	Ukraine	Theodoxus astrachanicus	Theodoxus major	Sands et al. 2019b	MN168745	MN175124	MN180615
24819	UGSB20406	46.2857	35.2908	Ukraine	Theodoxus astrachanicus	Theodoxus major	Sands et al. 2019b	MN168733	MN175112	MN180603
24820	UGSB20407	46.2857	35.2908	Ukraine	Theodoxus astrachanicus	Theodoxus major	Sands et al. 2019b	MN168734	MN175113	MN180604
24822	UGSB20409	46.2857	35.2908	Ukraine	Theodoxus astrachanicus	Theodoxus major	Sands et al. 2019b	MN168735	MN175114	MN180605
24845	UGSB20432	43.6281	51.1683	Kazakhstan	Theodoxus pallasi	Theodoxus major	Sands et al. 2019b	MN168648	MN175027	MN180518
24846	UGSB20433	43.6281	51.1683	Kazakhstan	Theodoxus pallasi	Theodoxus major	Sands et al. 2019b	MN168649	MN175028	MN180519
24847	UGSB20434	43.6281	51.1683	Kazakhstan	Theodoxus pallasi	Theodoxus major	Sands et al. 2019b	MN168650	MN175029	MN180520
24858	UGSB20445	43.1833	51.6527	Kazakhstan	Theodoxus pallasi	Theodoxus major	Sands et al. 2019b	MN168638	MN175017	MN180508
24859	UGSB20446	43.1833	51.6527	Kazakhstan	Theodoxus pallasi	Theodoxus major	Sands et al. 2019b	MN168639	MN175018	MN180509
24860	UGSB20447	43.1833	51.6527	Kazakhstan	Theodoxus pallasi	Theodoxus major	Sands et al. 2019b	MN168640	MN175019	MN180510
24876	UGSB20463	47.185	39.6298	Russia	Theodoxus astrachanicus	Theodoxus major	Sands et al. 2019b	MN168723	MN175102	MN180593
24877	UGSB20464	47.185	39.6298	Russia	Theodoxus astrachanicus	Theodoxus major	Sands et al. 2019b	MN168724	MN175103	MN180594
24878	UGSB20465	47.185	39.6298	Russia	Theodoxus astrachanicus	Theodoxus major	Sands et al. 2019b	MN168725	MN175104	MN180595
24896	UGSB20483	40.1429	44.1712	Armenia	Theodoxus schirazensis var. major	Theodoxus major	Sands et al. 2019b	MN168557	MN174936	MN180427
24897	UGSB20484	40.1429	44.1712	Armenia	Theodoxus schirazensis var. major	Theodoxus major	Sands et al. 2019b	MN168558	MN174937	MN180428
24901	UGSB20488	40.1663	44.4853	Armenia	Theodoxus schirazensis var. major	Theodoxus major	Sands et al. 2019b	MN168547	MN174926	MN180417
24902	UGSB20489	40.1663	44.4853	Armenia	Theodoxus schirazensis var. major	Theodoxus major	Sands et al. 2019b	MN168548	MN174927	MN180418
24903	UGSB20490	40.1663	44.4853	Armenia	Theodoxus schirazensis var. major	Theodoxus major	Sands et al. 2019b	MN168549	MN174928	MN180419
25014	UGSB20613	40.7751	49.5449	Azerbaijan	Theodoxus pallasi	Theodoxus major	Sands et al. 2019b	MN168559	MN174938	MN180429
25015	UGSB20614	40.7751	49.5449	Azerbaijan	Theodoxus pallasi	Theodoxus major	Sands et al. 2019b	MN168560	MN174939	MN180430
25016	UGSB20615	40.7751	49.5449	Azerbaijan	Theodoxus pallasi	Theodoxus major	Sands et al. 2019b	MN168561	MN174940	MN180431
25046	UGSB20645	39.0188	48.6997	Azerbaijan	Theodoxus pallasi	Theodoxus major	Sands et al. 2019b	MN168571	MN174950	MN180441
25047	UGSB20646	39.0188	48.6997	Azerbaijan	Theodoxus pallasi	Theodoxus major	Sands et al. 2019b	MN168572	MN174951	MN180442
25048	UGSB20647	39.0188	48.6997	Azerbaijan	Theodoxus pallasi	Theodoxus major	Sands et al. 2019b	MN168573	MN174952	MN180443
25115	UGSB20790	43.5059	51.0847	Kazakhstan	Theodoxus schultzii	Theodoxus major	Sands et al. 2019b	MN168668	MN175047	MN180538
25116	UGSB20791	43.5059	51.0847	Kazakhstan	Theodoxus schultzii	Theodoxus major	Sands et al. 2019b	MN168669	MN175048	MN180539
25117	UGSB20792	43.5059	51.0847	Kazakhstan	Theodoxus schultzii	Theodoxus major	Sands et al. 2019b	MN168670	MN175049	MN180540
25121	UGSB20796	44.222	50.8068	Kazakhstan	Theodoxus pallasi	Theodoxus major	Sands et al. 2019b	MN168658	MN175037	MN180528
25123	UGSB20798	44.222	50.8068	Kazakhstan	Theodoxus pallasi	Theodoxus major	Sands et al. 2019b	MN168659	MN175038	MN180529
25125	UGSB20800	44.222	50.8068	Kazakhstan	Theodoxus pallasi	Theodoxus major	Sands et al. 2019b	MN168660	MN175039	MN180530
25145	UGSB20820	45.7894	47.8878	Russia	Theodoxus astrachanicus	Theodoxus major	Sands et al. 2019b	MN168673	MN175052	MN180543
25146	UGSB20821	45.7894	47.8878	Russia	Theodoxus astrachanicus	Theodoxus major	Sands et al. 2019b	MN168674	MN175053	MN180544
25147	UGSB20822	45.7894	47.8878	Russia	Theodoxus astrachanicus	Theodoxus major	Sands et al. 2019b	MN168675	MN175054	MN180545
25157	UGSB20832	47.1671	47.4487	Russia	Theodoxus astrachanicus	Theodoxus major	Sands et al. 2019b	MN168693	MN175072	MN180563
25158	UGSB20833	47.1671	47.4487	Russia	Theodoxus astrachanicus	Theodoxus major	Sands et al. 2019b	MN168694	MN175073	MN180564
25159	UGSB20834	47.1671	47.4487	Russia	Theodoxus astrachanicus	Theodoxus major	Sands et al. 2019b	MN168695	MN175074	MN180565
25182	UGSB20857	46.3494	48.0198	Russia	Theodoxus astrachanicus	Theodoxus major	Sands et al. 2019b	MN168683	MN175062	MN180553
25183	UGSB20858	46.3494	48.0198	Russia	Theodoxus astrachanicus	Theodoxus major	Sands et al. 2019b	MN168684	MN175063	MN180554
25184	UGSB20859	46.3494	48.0198	Russia	Theodoxus astrachanicus	Theodoxus major	Sands et al. 2019b	MN168685	MN175064	MN180555
25205	UGSB20884	48.4541	44.3618	Russia	Theodoxus astrachanicus	Theodoxus major	Sands et al. 2019b	MN168713	MN175092	MN180583
25206	UGSB20885	48.4541	44.3618	Russia	Theodoxus astrachanicus	Theodoxus major	Sands et al. 2019b	MN168714	MN175093	MN180584
25207	UGSB20886	48.4541	44.3618	Russia	Theodoxus astrachanicus	Theodoxus major	Sands et al. 2019b	MN168715	MN175094	MN180585
25217	UGSB20896	48.429	44.9463	Russia	Theodoxus astrachanicus	Theodoxus major	Sands et al. 2019b	MN168703	MN175082	MN180573
25218	UGSB20897	48.429	44.9463	Russia	Theodoxus astrachanicus	Theodoxus major	Sands et al. 2019b	MN168704	MN175083	MN180574
25219	UGSB20898	48.429	44.9463	Russia	Theodoxus astrachanicus	Theodoxus major	Sands et al. 2019b	MN168705	MN175084	MN180575
25987	UGSB21655	37.3188	57.7374	Iran	Theodoxus cf. schirazensis var. major	Theodoxus major	Sands et al. 2019b	MN168593	MN174972	MN180463
25988	UGSB21656	37.3188	57.7374	Iran	Theodoxus cf. schirazensis var. major	Theodoxus major	Sands et al. 2019b	MN168594	MN174973	MN180464
25989	UGSB21657	37.3188	57.7374	Iran	Theodoxus cf. schirazensis var. major	Theodoxus major	Sands et al. 2019b	MN168595	MN174974	MN180465
26000	UGSB21668	37.4849	57.4363	Iran	Theodoxus cf. schirazensis var. major	Theodoxus major	Sands et al. 2019b	MN168581	MN174960	MN180451
26001	UGSB21669	37.4849	57.4363	Iran	Theodoxus cf. schirazensis var. major	Theodoxus major	Sands et al. 2019b	MN168582	MN174961	MN180452
26002	UGSB21670	37.4849	57.4363	Iran	Theodoxus cf. schirazensis var. major	Theodoxus major	Sands et al. 2019b	MN168583	MN174962	MN180453
23442	UGSB18098	34.19755	-4.79791	Morocco	Theodoxus aff. marteli	Theodoxus marteli	Sands et al. 2019a	MK754731	MK755070	MK755382
23443	UGSB18099	34.19755	-4.79791	Morocco	Theodoxus aff. marteli	Theodoxus marteli	Sands et al. 2019a	MK754732	MK755071	MK755383
23444	UGSB18100	34.19755	-4.79791	Morocco	Theodoxus aff. marteli	Theodoxus marteli	Sands et al. 2019a	MK754733	MK755072	MK755384
23439	UGSB18095	33.7797	-4.73213	Morocco	Theodoxus numidicus	Theodoxus numidicus	Sands et al. 2019a	MK754729	MK755068	na
23441	UGSB18097	33.7797	-4.73213	Morocco	Theodoxus numidicus	Theodoxus numidicus	Sands et al. 2019a	MK754730	MK755069	na
23446	UGSB18102	34.7781	-2.15333	Morocco	Theodoxus numidicus	Theodoxus numidicus	Sands et al. 2019a	MK754734	MK755073	na
23447	UGSB18103	34.7781	-2.15333	Morocco	Theodoxus numidicus	Theodoxus numidicus	Sands et al. 2019a	MK754735	MK755074	na
24916	UGSB20503	27.82	56.4	Iran	Theodoxus doriae	Theodoxus pallidus	Sands et al. 2019b	MN168633	MN175012	MN180503
24917	UGSB20504	27.82	56.4	Iran	Theodoxus doriae	Theodoxus pallidus	Sands et al. 2019b	MN168634	MN175013	MN180504
24918	UGSB20505	27.82	56.4	Iran	Theodoxus doriae	Theodoxus pallidus	Sands et al. 2019b	MN168635	MN175014	MN180505
25591	UGSB21262	29.1699	54.6846	Iran	Theodoxus pallidus	Theodoxus pallidus	Sands et al. 2019b	MN168623	MN175002	MN180493
25592	UGSB21263	29.1699	54.6846	Iran	Theodoxus pallidus	Theodoxus pallidus	Sands et al. 2019b	MN168624	MN175003	MN180494
25593	UGSB21264	29.1699	54.6846	Iran	Theodoxus pallidus	Theodoxus pallidus	Sands et al. 2019b	MN168625	MN175004	MN180495
26015	UGSB21683	30.1187	55.1217	Iran	Theodoxus doriae	Theodoxus pallidus	Sands et al. 2019b	MN168603	MN174982	MN180473
26016	UGSB21684	30.1187	55.1217	Iran	Theodoxus doriae	Theodoxus pallidus	Sands et al. 2019b	MN168604	MN174983	MN180474
26017	UGSB21685	30.1187	55.1217	Iran	Theodoxus doriae	Theodoxus pallidus	Sands et al. 2019b	MN168605	MN174984	MN180475
26027	UGSB21695	30.0151	54.3403	Iran	Theodoxus doriae	Theodoxus pallidus	Sands et al. 2019b	MN168613	MN174992	MN180483
26028	UGSB21696	30.0151	54.3403	Iran	Theodoxus doriae	Theodoxus pallidus	Sands et al. 2019b	MN168614	MN174993	MN180484
26029	UGSB21697	30.0151	54.3403	Iran	Theodoxus doriae	Theodoxus pallidus	Sands et al. 2019b	MN168615	MN174994	MN180485
26030	UGSB21698	30.0151	54.3403	Iran	Theodoxus doriae	Theodoxus pallidus	Sands et al. 2019b	MN168616	MN174995	MN180486
26031	UGSB21699	30.0151	54.3403	Iran	Theodoxus doriae	Theodoxus pallidus	Sands et al. 2019b	MN168617	MN174996	MN180487
26033	UGSB21701	30.0151	54.3403	Iran	Theodoxus doriae	Theodoxus pallidus	Sands et al. 2019b	MN168618	MN174997	MN180488
26034	UGSB21702	30.0151	54.3403	Iran	Theodoxus doriae	Theodoxus pallidus	Sands et al. 2019b	MN168619	MN174998	MN180489
26035	UGSB21703	30.0151	54.3403	Iran	Theodoxus doriae	Theodoxus pallidus	Sands et al. 2019b	MN168620	MN174999	MN180490
26036	UGSB21704	30.0151	54.3403	Iran	Theodoxus doriae	Theodoxus pallidus	Sands et al. 2019b	MN168621	MN175000	MN180491
26037	UGSB21705	30.0151	54.3403	Iran	Theodoxus doriae	Theodoxus pallidus	Sands et al. 2019b	MN168622	MN175001	MN180492
26418	UGSB22217	30.6672	52.2933	Iran	Theodoxus pallidus	Theodoxus pallidus	Sands et al. 2019b	MN168748	MN175127	MN180618
26419	UGSB22218	30.6672	52.2933	Iran	Theodoxus pallidus	Theodoxus pallidus	Sands et al. 2019b	MN168749	MN175128	MN180619
26421	UGSB22221	30.6672	52.2933	Iran	Theodoxus pallidus	Theodoxus pallidus	Sands et al. 2019b	MN168750	MN175129	MN180620
14442	RM10.136	38.1066	-1.87515	Spain	Theodoxus sp. nov.	Theodoxus sp. nov.	Sands et al. 2019a	MK754619	MK754960	na
TSUB1	na	43.0117	17.7778	Bosnia and Herzegovina	Theodoxus subterrelictus	Theodoxus subterrelictus	Sands et al. 2019a	MK754816	MK755160	na
14946	RM10.173	38.0652	40.0613	Turkey	Theodoxus cf. syriacus	Theodoxus syriacus	Sands et al. 2019a	MK754634	MK754975	MK755297
14947	UGSB24182	37.4434	40.6461	Turkey	Theodoxus cf. syriacus	Theodoxus syriacus	Sands et al. 2019a	MK754635	MK754976	MK755298
14948	RM10.175	37.5	40.6479	Turkey	Theodoxus cf. syriacus	Theodoxus syriacus	Sands et al. 2019a	MK754636	MK754977	MK755299
14949	RM10.176	37.4911	40.6799	Turkey	Theodoxus cf. syriacus	Theodoxus syriacus	Sands et al. 2019a	MK754637	MK754978	MK755300
14951	UGSB24183	38.1353	41.1886	Turkey	Theodoxus cf. syriacus	Theodoxus syriacus	Sands et al. 2019a	MK754638	MK754979	MK755301
14952	RM10.178	38.2111	41.5162	Turkey	Theodoxus cf. syriacus	Theodoxus syriacus	Sands et al. 2019a	MK754639	MK754980	MK755302
14953	RM10.179	38.187	41.5196	Turkey	Theodoxus cf. syriacus	Theodoxus syriacus	Sands et al. 2019a	MK754640	MK754981	MK755303
14954	RM10.180	37.2274	41.3338	Turkey	Theodoxus cf. syriacus	Theodoxus syriacus	Sands et al. 2019a	MK754641	MK754982	MK755304
14956	RM10.181	37.4405	40.8556	Turkey	Theodoxus cf. syriacus	Theodoxus syriacus	Sands et al. 2019a	MK754642	MK754983	MK755305
14957	RM10.182	37.51	40.8488	Turkey	Theodoxus cf. syriacus	Theodoxus syriacus	Sands et al. 2019a	MK754643	MK754984	MK755306
14958	RM10.183	37.5438	40.8845	Turkey	Theodoxus cf. syriacus	Theodoxus syriacus	Sands et al. 2019a	MK754644	MK754985	MK755307
14959	RM10.184	37.5181	40.6981	Turkey	Theodoxus cf. syriacus	Theodoxus syriacus	Sands et al. 2019a	MK754645	MK754986	MK755308
14960	RM10.185	37.8307	40.2033	Turkey	Theodoxus cf. syriacus	Theodoxus syriacus	Sands et al. 2019a	MK754646	MK754987	MK755309
TX004	na	X	X	Greece	Theodoxus peloponensis *(potentially misidentified)	Theodoxus syriacus	Bunje and Lindberg 2007	na	AY771260	na
8921	RM08.079	40.9874	22.5587	Greece	Theodoxus transversalis	Theodoxus transversalis	Sands et al. 2019a	MK754529	MK754871	MK755203
8922	RM08.079	40.9874	22.5587	Greece	Theodoxus transversalis	Theodoxus transversalis	Sands et al. 2019a	MK754530	MK754872	MK755204
8923	RM08.079	40.9874	22.5587	Greece	Theodoxus transversalis	Theodoxus transversalis	Sands et al. 2019a	MK754531	MK754873	MK755205
23558	UGSB18456	41.1504	22.5237	Macedonia	Theodoxus transversalis	Theodoxus transversalis	Sands et al. 2019a	MK754769	MK755108	MK755416
23559	UGSB18457	41.1504	22.5237	Macedonia	Theodoxus transversalis	Theodoxus transversalis	Sands et al. 2019a	MK754770	MK755109	MK755417
23560	UGSB18458	41.1955	22.5315	Macedonia	Theodoxus transversalis	Theodoxus transversalis	Sands et al. 2019a	MK754771	MK755110	MK755418
23561	UGSB18459	41.1955	22.5315	Macedonia	Theodoxus transversalis	Theodoxus transversalis	Sands et al. 2019a	MK754772	MK755111	MK755419
TransB2	na	48.2868	20.7352	Hungary	Theodoxus transversalis	Theodoxus transversalis	Fehér et al. 2012	HM171591	na	JQ678845
TransB3	na	48.3211	20.7205	Hungary	Theodoxus transversalis	Theodoxus transversalis	Fehér et al. 2012	HM171591	na	JQ678845
TransH	na	48.1022	20.9531	Hungary	Theodoxus transversalis	Theodoxus transversalis	Fehér et al. 2012	HM171591	na	JQ678845
TransR	na	47.0367	16.667	Hungary	Theodoxus transversalis	Theodoxus transversalis	Fehér et al. 2012	HM171591	na	na
TransT	na	48.0873	22.8199	Hungary	Theodoxus transversalis	Theodoxus transversalis	Fehér et al. 2012	HM171591	na	JQ678845
TransZ1	na	43.2014	24.1538	Bulgaria	Theodoxus transversalis	Theodoxus transversalis	Fehér et al. 2012	HM171592	na	JQ678846
TransZ2	na	43.2014	24.1538	Bulgaria	Theodoxus transversalis	Theodoxus transversalis	Fehér et al. 2012	HM171592	na	JQ678844
6402	UGSB24184	45.3926	29.6157	Ukraine	Theodoxus velox	Theodoxus velox	Sands et al. 2019a	MK754483	MK754825	MK755169
6764	RM06.406	44.5366	33.6862	Ukraine	Theodoxus velox	Theodoxus velox	Sands et al. 2019a	MK754486	MK754828	MK755172
6767	RM06.386	50.4388	30.588	Ukraine	Theodoxus cf. sarmaticus	Theodoxus velox	Sands et al. 2019a	MK754487	MK754829	MK755173
6768	RM06.389	46.6002	32.5825	Ukraine	Theodoxus velox	Theodoxus velox	Sands et al. 2019a	MK754488	MK754830	MK755174
7894	RM06.330	46.5827	18.8724	Hungary	Theodoxus cf. velox	Theodoxus velox	Sands et al. 2019a	MK754491	MK754833	MK755176
7897	RM06.320	47.4872	19.0554	Hungary	Theodoxus cf. velox	Theodoxus velox	Sands et al. 2019a	MK754492	MK754834	MK755177
9136	PC08-67	47.1112	39.4414	Russia	Theodoxus velox	Theodoxus velox	Sands et al. 2019a	MK754541	MK754883	MK755215
9137	PC08-67	47.1112	39.4414	Russia	Theodoxus cf. sarmaticus	Theodoxus velox	Sands et al. 2019a	MK754542	MK754884	MK755216
9636	RM09.148	40.7348	30.2499	Turkey	Theodoxus sp.	Theodoxus velox	Sands et al. 2019a	MK754567	MK754909	MK755237
11384	RM09.51	40.7348	30.2499	Turkey	Theodoxus sp.	Theodoxus velox	Sands et al. 2019a	MK754570	MK754912	MK755240
12891	DEU09.022	48.6086	13.268	Germany	Theodoxus cf. velox	Theodoxus velox	Sands et al. 2019a	MK754606	MK754948	MK755269
12892	DEU09.022	48.6086	13.268	Germany	Theodoxus cf. velox	Theodoxus velox	Sands et al. 2019a	MK754607	MK754949	MK755270
14184	RM10.105	55.24	21.532	Lithuania	Theodoxus cf. velox	Theodoxus velox	Sands et al. 2019a	MK754615	MK754956	MK755279
14185	UGSB24185	55.24	21.532	Lithuania	Theodoxus cf. velox	Theodoxus velox	Sands et al. 2019a	MK754616	MK754957	MK755280
23412	UGSB18160	50.5606	30.5597	Ukraine	Theodoxus velox	Theodoxus velox	Sands et al. 2019a	MK754706	MK755045	MK755359
23414	UGSB18162	50.5606	30.5597	Ukraine	Theodoxus velox	Theodoxus velox	Sands et al. 2019a	MK754708	MK755047	MK755361
23432	UGSB18180	44.4969	33.7822	Ukraine	Theodoxus velox	Theodoxus velox	Sands et al. 2019a	MK754723	MK755062	MK755376
23552	UGSB18437	47.6093	38.0229	Ukraine	Theodoxus cf. sarmaticus	Theodoxus velox	Sands et al. 2019a	MK754765	MK755104	MK755414
24163	UGSB19135	40.7345	30.2498	Turkey	Theodoxus sp.	Theodoxus velox	Sands et al. 2019a	MK754795	MK755139	MK755447
24927	UGSB20514	52.660625	38.601909	Russia	Theodoxus cf. sarmaticus	Theodoxus velox	Sequenced for this study	MN657524	MN650269	na
9333	RM09.130	40.0441	30.4536	Turkey	Theodoxus wesselinghi sp. nov.	Theodoxus wesselinghi sp. nov.	Sands et al. 2019a	MK754544	MK754886	na
11390	RM09.54	38.0036	31.4722	Turkey	Theodoxus wesselinghi sp. nov.	Theodoxus wesselinghi sp. nov.	Sands et al. 2019a	MK754574	MK754916	na
11391	RM09.54	38.0036	31.4722	Turkey	Theodoxus wesselinghi sp. nov.	Theodoxus wesselinghi sp. nov.	Sands et al. 2019a	MK754575	MK754917	na
11393	RM09.55	37.8256	31.6748	Turkey	Theodoxus wesselinghi sp. nov.	Theodoxus wesselinghi sp. nov.	Sands et al. 2019a	MK754576	MK754918	na
24164	UGSB19136	37.8256	31.6748	Turkey	Theodoxus wesselinghi sp. nov.	Theodoxus wesselinghi sp. nov.	Sands et al. 2019a	MK754796	MK755140	na
24167	UGSB19139	38.0036	31.4722	Turkey	Theodoxus wesselinghi sp. nov.	Theodoxus wesselinghi sp. nov.	Sands et al. 2019a	MK754799	MK755143	na
24176	UGSB19155	37.8256	31.6748	Turkey	Theodoxus wesselinghi sp. nov.	Theodoxus wesselinghi sp. nov.	Sands et al. 2019a	MK754806	MK755150	na
24178	UGSB19157	38.0036	31.4722	Turkey	Theodoxus wesselinghi sp. nov.	Theodoxus wesselinghi sp. nov.	Sands et al. 2019a	MK754808	MK755152	na
25245	UGSB20735	38.0036	31.4722	Turkey	Theodoxus wesselinghi sp. nov.	Theodoxus wesselinghi sp. nov.	Sequenced for this study	MN657539	MN650284	na
25246	UGSB20736	38.0036	31.4722	Turkey	Theodoxus wesselinghi sp. nov.	Theodoxus wesselinghi sp. nov.	Sequenced for this study	MN657540	MN650285	na
25247	UGSB20737	37.8256	31.6748	Turkey	Theodoxus wesselinghi sp. nov.	Theodoxus wesselinghi sp. nov.	Sequenced for this study	MN657541	MN650286	na
25248	UGSB20738	37.8256	31.6748	Turkey	Theodoxus wesselinghi sp. nov.	Theodoxus wesselinghi sp. nov.	Sequenced for this study	MN657542	MN650287	na
25249	UGSB20739	39.1528	31.6156	Turkey	Theodoxus wesselinghi sp. nov.	Theodoxus wesselinghi sp. nov.	Sequenced for this study	MN657543	MN650288	MN657486
25250	UGSB20740	39.1528	31.6156	Turkey	Theodoxus wesselinghi sp. nov.	Theodoxus wesselinghi sp. nov.	Sequenced for this study	MN657544	MN650289	MN657487
25253	UGSB20743	40.0439	30.452	Turkey	Theodoxus wesselinghi sp. nov.	Theodoxus wesselinghi sp. nov.	Sequenced for this study	MN657547	MN650292	MN657488
25254	UGSB20744	40.0439	30.452	Turkey	Theodoxus wesselinghi sp. nov.	Theodoxus wesselinghi sp. nov.	Sequenced for this study	MN657548	MN650293	MN657489
11388	RM09.53	39.3493	31.0553	Turkey	Theodoxus wilkei sp. nov.	Theodoxus wilkei sp. nov.	Sands et al. 2019a	MK754572	MK754914	na
11389	RM09.53	39.3493	31.0553	Turkey	Theodoxus wilkei sp. nov.	Theodoxus wilkei sp. nov.	Sands et al. 2019a	MK754573	MK754915	na
24165	UGSB19137	39.3493	31.0553	Turkey	Theodoxus wilkei sp. nov.	Theodoxus wilkei sp. nov.	Sands et al. 2019a	MK754797	MK755141	na
25251	UGSB20741	39.3493	31.0553	Turkey	Theodoxus wilkei sp. nov.	Theodoxus wilkei sp. nov.	Sequenced for this study	MN657545	MN650290	na
25252	UGSB20742	39.3493	31.0553	Turkey	Theodoxus wilkei sp. nov.	Theodoxus wilkei sp. nov.	Sequenced for this study	MN657546	MN650291	na
References
Bunje PME, Lindberg DR (2007) Lineage divergence of a freshwater snail clade associated with post-Tethys marine basin development. Molecular Phylogenetics and Evolution 42 (2): 373–387. https://doi.org/10.1016/j.ympev.2006.06.026
Fehér Z, Albrecht C, Major Á, Sereda SV, Krízsik V (2012) Extremely low genetic diversity in the endangered striped nerite, Theodoxus transversalis (Mollusca, Gastropoda, Neritidae) – a result of ancestral or recent effects? North-Western Journal of Zoology 8 (2): 300–307.
Sands AF, Sereda SV, Stelbrink B, Neubauer TA, Lazarev S, Wilke T, Albrecht C (2019a) Contributions of biogeographical functions to species accumulation may change over time in refugial regions. Journal of Biogeography 46 (6): 1274–1286.
Sands AF, Neubauer TA, Nasibi S, Fasihi Harandi M, Anistratenko VV, Wilke T, Albrecht C (2019b) Old lake vs. young taxa: a comparative phylogeographic perspective on the evolution of Caspian Sea gastropods (Neritidae: Theodoxus). Royal Society Open Science 6 (10): 190965.

## Sheet: Table S2
Table S2. Collection details of all specimens and type material photographed for the current study.
Species	Previously identified as	Figure no.	Type status	Institution	Collection code	Location	GPS coordinates		Notes on phylogenetic assessment
							N/S	E/W
Shell and/or opeculum
T. altenai	T. altenai	Fig. 4A–C	Holotype	NMNL	RNL V.56/1	Kırkgöz gölü, Döşemealtı, Antalya, Turkey	na	na	Not sequenced, but from the same location as sequenced individuals used in the phylogeny (i.e. preparation no. 5586, 5587, 9350, 9351; Table S1)
	T. altenai	Fig. 4D–G	Topotype	UGSB	UGSB24167	Kırkgöz gölü, Döşemealtı, Antalya, Turkey	37.11	30.5804	Used in the phylogeny (i.e. preparation no. 5587; Table S1)
T. anatolicus	T. anatolicus	Fig. 5A–D	Specimen	UGSB	UGSB24168	Işıklı, Denizli, Turkey	38.3231	29.8514	Used in the phylogeny (i.e. preparation no. 11408; Table S1)
	N. anatolica	Fig. 5E–G	Lectotype	MHNG	MHNG-MOLL-15028	Izmir, Turkey	na	na	Not used in the phylogeny
	N. anatolica	Fig. 5H, I	Paralectotype	MHNG	MHNG-MOLL-15028	Izmir, Turkey	na	na	Not used in the phylogeny
	N. anatolica	Fig. 5J, K	Paralectotype	MNHN	MNHN-IM-2000-32519	Chios, Greece	na	na	Not used in the phylogeny
	N. belladonna	Fig. 5L, M	Syntype	ZMZ	ZMZ528908	Izmir, Turkey	na	na	Not used in the phylogeny
T. baeticus	N. baetica	Fig. 6A–C	Paralectotype	MHNG	MHNG-MOLL-51319	Andalusia, Spain	na	na	Not used in the phylogeny
	N. baetica	Fig. 6D	Paralectotype	MHNG	MHNG-MOLL-51319	Andalusia, Spain	na	na	Not used in the phylogeny
	N. baetica	Fig. 6E–G	Lectotype	MHNG	MHNG-MOLL-51319	Andalusia, Spain	na	na	Not used in the phylogeny
	N. meridionalis	Fig. 6H–J	Syntype	ZMB	Without collection number	Sicily, Italy	na	na	Not used in the phylogeny
	N. meridionalis	Fig. 6K	Syntype	ZMB	Without collection number	Sicily, Italy	na	na	Not used in the phylogeny
	N. meridionalis	Fig. 6L	Syntype	ZMB	Without collection number	Sicily, Italy	na	na	Not used in the phylogeny
	N. meridionalis	Fig. 6M	Syntype	ZMB	Without collection number	Sicily, Italy	na	na	Not used in the phylogeny
	N. meridionalis	Fig. 6N	Syntype	ZMB	Without collection number	Sicily, Italy	na	na	Not used in the phylogeny
	N. guardianensis	Fig. 6O–R	Topotype	UGSB	UGSB22084	Guadiana River near Mértola, Portugal	37.5553	-7.53345	Used in the phylogeny (i.e. preparation no. 26312; Table S1)
	T. baeticus	Fig. 6S–V	Specimen	UGSB	UGSB19162	Sóller, Balearic Islands, Spain	39.766	2.71534	Used in the phylogeny (i.e. preparation no. 24180; Table S1)
	T. callosus	Fig. 7A–D	Specimen	UGSB	UGSB19118	Akyaka, Turkey	37.0552	28.3329	Not sequenced, but from the same location as sequenced individuals used in the phylogeny (i.e. preparation no. 24168; Table S1)
	T. callosus	Fig. 7E–H	Specimen	UGSB	UGSB2488	Káto Tragána, Greece	38.588	21.4943	Not sequenced and from unsequenced location, but close to such a location and morphologically conforms to other geographically-close specimens used in the phylogeny
	T. varius	Fig. 7I–L	Specimen	UGSB	UGSB24170	Blue Eye Nature Monument, Albania	39.9234	20.1927	Used in the phylogeny (i.e. preparation no. 8129; Table S1)
	T. meridionalis	Fig. 7M–P	Specimen	UGSB	UGSB18111	Ketana Oasis, Gabes, Tunisia	33.7587	10.2064	Used in the phylogeny (i.e. preparation no. 23455; Table S1)
	T. baeticus	Fig. 8A–D	Specimen	UGSB	UGSB22089	Cuquillo, Granada, Andalusia, Spain	37.8189	-2.76768	Used in the phylogeny (i.e. preparation no. 26317; Table S1)
	T. meridionalis	Fig. 8E–H	Specimen	UGSB	UGSB22090	Palancia River, Navajas, Spain	39.8777	-0.501717	Used in the phylogeny (i.e. preparation no. 26318; Table S1)
	T. elongatulus	Fig. 8I–L	Specimen	UGSB	UGSB22080	Arrancada, Pombal, Portugal	39.9786	-8.57292	Used in the phylogeny (i.e. preparation no. 26308; Table S1)
	T. velascoi	Fig. 8M–P	Specimen	UGSB	UGSB22082	Montanejos, Castellón, Spain	40.0742	-0.533917	Used in the phylogeny (i.e. preparation no. 26310; Table S1)
T. cf. valentinus	T. cf. valentinus	Fig. 8Q–S	Specimen	UGSB	UGSB21787	Verd River, Masalavés, Spain	39.1357	-0.524633	Not sequenced, but from the same location as sequenced individuals used in the phylogeny (i.e. preparation no. 26315; Table S1)
	T. cf. valentinus	Fig. 8T	Specimen	UGSB	UGSB22087	Verd River, Masalavés, Spain	39.1357	-0.524633	Used in the phylogeny (i.e. preparation no. 26315; Table S1)
T. fluviatilis	T. fluviatilis	Fig. 9A–D	Specimen	UGSB	UGSB18106	close to Oued Laabid, Morocco	32.1059	-7.0434	Used in the phylogeny (i.e. preparation no. 23450; Table S1)
	T. fluviatilis	Fig. 9E–H	Specimen	UGSB	UGSB24173	Danube River, Wörth an der Donau, Germany	48.98914	12.34356	Not sequenced and from unsequenced location, but close to such a location and morphologically conforms to other geographically-close specimens used in the phylogeny
	T. euxinus	Fig. 9I–L	Specimen	UGSB	UGSB24172	Papuç Creek, Kıyıköy, Turkey	41.637	28.093	Used in the phylogeny (i.e. preparation no. 8134; Table S1)
	T. euxinus	Fig. 9M–P	Specimen	UGSB	UGSB18124	Ovidiopol, Ukraine	46.217	30.4267	Not sequenced, but from the same location as sequenced individuals used in the phylogeny (i.e. preparation no. 23410, 23411; Table S1)
	T. heldreichi	Fig. 9Q–S	Specimen	UGSB	UGSB20361	Lake Eğirdir, Turkey	38.1755	30.7552	Not sequenced, but from the same location as sequenced individuals used in the phylogeny (i.e. preparation no. 24935, 24936; Table S1)
	T. danasteri	Fig. 9T, U	Specimen	UGSB	UGSB18417	Krasna Kosa, Ukraine	46.3324	30.1013	Used in the phylogeny (i.e. preparation no. 23532; Table S1)
	T. danasteri	Fig. 9V	Specimen	UGSB	UGSB24171	Lake Skadar, Montenegro	42.2107	19.1831	Not sequenced, but from the same location as sequenced individuals (i.e. preparation no. 12896)
	T. fluviatilis (conforming to T. sarmaticus)	Fig. 10A–D	Specimen	UGSB	UGSB18328	Dnieper-Bug estuary, Ukraine	46.4871	32.1937	Not sequenced, but from the same location as sequenced individuals used in the phylogeny (i.e. preparation no. 23371; Table S1)
	T. subthermalis	Fig. 10E–H	Specimen	UGSB	UGSB18402	Novy Afon, Abkhazia, Georgia	43.0856	40.8142	Not sequenced and from unsequenced location, but close to such a location and morphologically conforms to other geographically-close specimens used in the phylogeny
	N. saulcyi	Fig. 10I–K	Syntype	MHNG	MHNG-MOLL-111736	Penteli Monastery, Greece	na	na	Not used in the phylogeny
	T. saulcyi	Fig. 10L	Specimen	UGSB	UGSB20519	Stilos, Crete, Greece	35.4343	24.1272	Used in the phylogeny (i.e. preparation no. 24932; Table S1)
T. gloeri	T. gloeri	Fig. 11A–C	Paratype	Coll. Peter Glöer	Coll. Peter Glöer	Balıkdamı Wetland-Sakarya River, Eskişehir, Turkey	39.1528	31.6156	Not used in the phylogeny
T. gurur sp. nov.	T. gurur sp. nov.	Fig. 13A–D	Holotype	NMNL	RMNH.MOL.342197	Suyunbaşı spring complex, Ayrancılar, İzmir, Turkey	38.2483	27.2812	Not sequenced, but from the same location as sequenced individuals used in the phylogeny (i.e. preparation no. 11421, 24166, 24177, 25255, 25256; Table S1)
	T. gurur sp. nov.	Fig. 13E–G	Paratype	NMNL	RMNH.MOL.342199	Suyunbaşı spring complex, Ayrancılar, İzmir, Turkey	38.2483	27.2812	Not sequenced, but from the same location as sequenced individuals used in the phylogeny (i.e. preparation no. 11421, 24166, 24177, 25255, 25256; Table S1)
T. jordani	T. jordani	Fig. 15A–D	Specimen	UGSB	UGSB18321	Avakas Gorge, Peyia, Cyprus	34.9203	32.3381	Used in the phylogeny (i.e. preparation no. 23377; Table S1)
	T. jordani	Fig. 15E–H	Specimen	UGSB	UGSB20777	Ceyhan River, Eski Misis, Adana, Turkey	36.9572	35.6252	Used in the phylogeny (i.e. preparation no. 25287; Table S1)
	T. jordani	Fig. 15I–L	Specimen	UGSB	UGSB24175	Orontes River, Antakya, Hatay, Turkey	36.2528	36.245	Used in the phylogeny (i.e. preparation no. 14932; Table S1)
	T. euphraticus	Fig. 15M–O	Specimen	UGSB	UGSB22233	Seyed Hosein Park spring, near the Bishapur, Fars, Iran	29.79802	51.5691	Not sequenced, although processed (i.e. preparation no. 26434). However, from the same location as other specimens used in the phylogeny (i.e. preparation no. 26437, 26438; Table S1)
	N. jordani	Fig. 15P–R	Topotype	UGSB	UGSB24177	Jordan River, Israel	32.7104	35.5761	Used in the phylogeny (i.e. preparation no. 17759; Table S1)
	T. euphraticus	Fig. 15S, T	Specimen	UGSB	UGSB21681	Karun River, Ahvaz, Iran	31.3075	48.669	Sequenced, but not used in the phylogeny (i.e. preparation no. 26013; GenBank accession numbers MN650315, MN657499, MN657569). However, from the same location as other specimens used in the phylogeny (i.e. preparation no. 26012; Table S1)
	T. niloticus	Fig. 15U	Specimen	UGSB	UGSB24178	Nile River, Egypt	30.0051	31.226	Used in the phylogeny (i.e. preparation no. 12882; Table S1)
	T. euphraticus	Fig. 15V	Specimen	UGSB	UGSB21682	Karun River, Ahvaz, Iran	31.3075	48.669	Sequenced, but not used in the phylogeny (i.e. preparation no. 26014; GenBank accession numbers MN650316, MN657500, MN657570). However, from the same location as other specimens used in the phylogeny (i.e. preparation no. 26012; Table S1)
	N. euphratica	Fig. 16A, B	Syntype	ZMZ	ZMZ528916	Euphrates River at Samawah, Iraq	na	na	Not used in the phylogeny
	N. michonii	Fig. 16C–E	Syntype	MHNG	MHNG-MOLL-111706	Syria	na	na	Not used in the phylogeny
	N. karasuna	Fig. 16F–H	Syntype	ZMZ	ZMZ528937	Karasu River, south-eastern Turkey	na	na	Not used in the phylogeny
	N. ponsoti	Fig. 16I, J	Syntype	MNHN	MNHN-IM-2000-32754	Lake Muzayrīb, Syria	na	na	Not used in the phylogeny
	N. ponsoti	Fig. 16K, L	Syntype	MNHN	MNHN-IM-2000-32754	Lake Muzayrīb, Syria	na	na	Not used in the phylogeny
	N. ponsoti	Fig. 16M	Syntype	RBINS	MT820	Lake Muzayrīb, Syria	na	na	Not used in the phylogeny
	N. jordani var. turris	Fig. 16N	Syntype	ZMZ	ZMZ528930	Sea of Galilee	na	na	Not used in the phylogeny
	N. bellardii	Fig. 16O, P	Syntype	ZMZ	ZMZ528918	Litani River, Beqaa valley, Lebanon	na	na	Not used in the phylogeny
	N. meridionalis var. mesopotamica	Fig. 17A–C	Syntype	ZMZ	ZMZ528914	near Diyarbakır, Turkey	na	na	Not used in the phylogeny
	T. mesopotamicus	Fig. 17D, E	Specimen	UGSB	UGSB23426	Şanlıurfa, Turkey	37.1475	38.7845	Used in the phylogeny (i.e. preparation no. 27047; Table S1)
	N. cinctella	Fig. 17F–H	Syntype	ZMB	ZMB/Moll21732	source of River Chabur near Ras al-Ayn, Syria	na	na	Not used in the phylogeny
	N. cinctella	Fig. 17K–M	Syntype	ZMB	ZMB/Moll21732	source of River Chabur near Ras al-Ayn, Syria	na	na	Not used in the phylogeny
	N. cinctella	Fig. 17I, J	Topotype	UGSB	UGSB18762	source of River Chabur near Ras al-Ayn, Syria	36.8396	40.0787	Not sequenced, although processed (i.e. preparation no. 27045)
T. macri	T. macri	Fig. 18A–D	Specimen	UGSB	UGSB24179	Harbiye Falls, Harbiye, Antakya, Turkey	36.1286	36.1435	Used in the phylogeny (i.e. preparation no. 14927; Table S1)
	T. macri	Fig. 18E–H	Specimen	UGSB	UGSB24180	Lake Yenişehir, Reyhanlı, Turkey	36.2361	36.5688	Used in the phylogeny (i.e. preparation no. 14934; Table S1)
	T. macri	Fig. 18I, J	Specimen	UGSB	UGSB24181	Lake Balık, Adalar, Turkey	36.5031	36.4979	Used in the phylogeny (i.e. preparation no. 14936; Table S1)
T. major	T. pallasi	Fig. 19A, B	Specimen	UGSB	UGSB20712	Caspian Sea, offshore from Aktau, Kazakhstan	43.5294	51.1707	Not sequenced and from unsequenced location, but close to such a location and morphologically conforms to other geographically-close specimens used in the phylogeny
	T. pallasi	Fig. 19C, D	Specimen	UGSB	UGSB19129	Aral Sea, Kazakhstan	na	na	Not used in the phylogeny
	T. pallasi	Fig. 19E–H	Specimen	UGSB	UGSB18091	Shahpol River, Aliabad Askar Khan, Iran	36.5851	51.7903	Used in the phylogeny (i.e. preparation no. 23435; Table S1)
	T. major	Fig. 19I–K	Specimen	UGSB	UGSB20482	outflow of Lake Akna, Aknalich, Armenia	40.1429	44.1712	Sequenced, but not used in the phylogeny (i.e. preparation no. 24895; GenBank accession numbers MN650268, MN657477, MN657523). However, from the same location as other specimens used in the phylogeny (i.e. preparation no. 9120, 9122, 9123, 24896, 24897; Table S1)
	T. astrachanicus	Fig. 19L–N	Specimen	UGSB	UGSB18130	Utlyukskij Liman, Ukraine	46.149983	35.04865	Not sequenced, but from the same location as sequenced individuals used in the phylogeny (i.e. preparation no. 23426–23428, 24801–24803; Table S1)
	T. major	Fig. 19O, P	Specimen	UGSB	UGSB20496	Hrazdan River at the inflow of the Yerevan Reservoir, Armenia	40.1663	44.4853	Sequenced, but not used in the phylogeny (i.e. preparation no. 24909; GenBank accession numbers MN168555, MN174934, MN180425 ). However, from the same location as other specimens used in the phylogeny (i.e. preparation no. 9124–9126, 24901–24903; Table S1)
	T. major	Fig. 19Q–T	Specimen	UGSB	UGSB21661	Zoeram, North Khorasan, Iran	37.3188	57.7374	Sequenced, but not used in the phylogeny (i.e. preparation no. 25993; GenBank accession numbers MN168599, MN174978, MN180469). However, from the same location as other specimens used in the phylogeny (i.e. preparation no. 25987–25989; Table S1)
	T. schultzii	Fig. 19U, V	Specimen	UGSB	UGSB20714	Caspian Sea, offshore from Aktau, Kazakhstan	43.5059	51.0847	Not sequenced, but from the same location as sequenced individuals used in the phylogeny (i.e. preparation no.25115–25117; Table S1)
	T. pallasi	Fig. 19W–Y	Lectotype	ZIN	ZIN54547/63	Caspian Sea, Dagestan, Russia	na	na	Not used in the phylogeny
	N. schultzii	Fig. 19Za, Zb	Syntype	ZIN	ZIN, no. 5 in systematic catalogue	Caspian Sea	na	na	Not used in the phylogeny
T. pallidus	T. pallidus	Fig. 20A–D	Specimen	UGSB	UGSB22227	Haji Abad, Fars, Iran	30.6672	52.2933	Sequenced, but not used in the phylogeny (i.e. preparation no. 26428; GenBank accession numbers MN168757, MN175136, MN180627). However, from the same location as other specimens used in the phylogeny (i.e. preparation no. 26418, 26419, 26421; Table S1)
	N. pallida	Fig. 20E–H	Syntype	ZMB	ZMB108.792	southern Iran	na	na	Not used in the phylogeny
	N. pallida	Fig. 20I, J	Syntype	ZMB	ZMB108.793	southern Iran	na	na	Not used in the phylogeny
	N. pallida	Fig. 20K, L	Syntype	ZMB	ZMB108.793	southern Iran	na	na	Not used in the phylogeny
	T. doriae	Fig. 20M–P	Specimen	UGSB	UGSB21706	spring near Harat, Yazd, Iran	30.0151	54.3403	Sequenced, but not used in the phylogeny (i.e. preparation no. 26038; GenBank accession numbers MN650317, MN657501, MN657571). However, from the same location as other specimens used in the phylogeny (i.e. preparation no. 26027–26029; Table S1)
	N. doriae	Fig. 20Q, R	Syntype	MSNG	Without collection number	thermal springs of Kerman, Iran	na	na	Not used in the phylogeny
	N. doriae	Fig. 20S, T	Syntype	MSNG	Without collection number	thermal springs of Kerman, Iran	na	na	Not used in the phylogeny
	N. doriae	Fig. 20U, V	Syntype	MSNG	Without collection number	thermal springs of Kerman, Iran	na	na	Not used in the phylogeny
	N. doriae	Fig. 20W–Y	Syntype	MSNG	Without collection number	thermal springs of Kerman, Iran	na	na	Not used in the phylogeny
T. syriacus	T. syriacus	Fig. 21A–D	Specimen	UGSB	UGSB24182	Sultanköyü, Mardin, Turkey	37.4434	40.6461	Used in the phylogeny (i.e. preparation no. 14947; Table S1)
	T. syriacus	Fig. 21E–H	Specimen	UGSB	UGSB20518	Yanarsu Stream, Alıçlı, Turkey	38.202	41.533	Not sequenced, although processed (i.e. preparation no. 24931)
	T. syriacus	Fig. 21I–L	Specimen	UGSB	UGSB24183	near Başdeğirmen, Diyarbakır, Turkey	38.1353	41.1886	Used in the phylogeny (i.e. preparation no. 14951; Table S1)
	N. syriaca	Fig. 21M–O	Specimen	MHNG	MHNG-MOLL-111712	İskenderun, Turkey	na	na	Not used in the phylogeny
	N. syriaca	Fig. 21P–R	Specimen	MHNG	MHNG-MOLL-111712	İskenderun, Turkey	na	na	Not used in the phylogeny
T. velox	T. velox	Fig. 22A–D	Specimen	UGSB	UGSB24186	Dnieper River, Kiev, Ukraine	50.4388	30.588	Not sequenced, but from the same location as sequenced individuals used in the phylogeny (i.e. preparation no. 6767; Table S1)
	T. velox	Fig. 22E–H	Specimen	UGSB	UGSB24184	Danube delta, Vylkove, Ukraine	45.3926	29.6157	Used in the phylogeny (i.e. preparation no. 6402; Table S1)
	T. velox	Fig. 22I, J	Holotype	IZAN	Without collection number	Dnieper Delta, Zbur'ivka Liman, Ukraine	na	na	Not used in the phylogeny
	T. velox	Fig. 22K–M	Specimen	UGSB	UGSB20691	Lake Sapanca, Yeni Eşme, Turkey	40.7295	30.2217	Not sequenced and from unsequenced location, but close to such a location and morphologically conforms to other geographically-close specimens used in the phylogeny
T. sarmaticus	N. fluviatilis var. sarmatica	Fig. 22N–P	Syntype	ZIN	6099/24	Oskol River, near Golubino, Russia	na	na	Not used in the phylogeny
	N. fluviatilis var. sarmatica	Fig. 22Q–S	Syntype	ZIN	6099/24	Oskol River, near Golubino, Russia	na	na	Not used in the phylogeny
	N. fluviatilis var. sarmatica	Fig. 22T–U	Syntype	ZIN	6099/24	Oskol River, near Golubino, Russia	na	na	Not used in the phylogeny
T. wesselinghi sp. nov.	T. wesselinghi sp. nov.	Fig. 24A–D	Holotype	NMNL	RMNH.MOL.342200	Sakarya River, Çayköy, Bilecik, Turkey	40.0439	30.452	Not sequenced, but from the same location as sequenced individuals used in the phylogeny (i.e. preparation no. 25253, 25254; Table S1)
	T. wesselinghi sp. nov.	Fig. 24E–G	Paratype	NMNL	RMNH.MOL.342202	Sakarya River, Çayköy, Bilecik, Turkey	40.0439	30.452	Not sequenced, but from the same location as sequenced individuals used in the phylogeny (i.e. preparation no. 25253, 25254; Table S1)
	T. wesselinghi sp. nov.	Fig. 24H–J	Paratype	NMNL	RMNH.MOL.342204	roadside spring in Fele, Isparta province, Turkey	38.0036	31.4722	Not sequenced, but from the same location as sequenced individuals used in the phylogeny (i.e. preparation no. 11390, 11391, 24167, 24178, 25245, 25246; Table S1)
	T. wesselinghi sp. nov.	Fig. 24K–M	Paratype	NMNL	RMNH.MOL.342206	Eflatun Pınarı, Konya province, Turkey	37.8256	31.6748	Not sequenced, but from the same location as sequenced individuals used in the phylogeny (i.e. preparation no. 11393, 24164, 24176, 25247, 25248; Table S1)
T. wilkei sp. nov.	T. wilki sp. nov.	Fig. 27A–D	Holotype	NMNL	RMNH.MOL.342208	Çifteler spring, Çifteler, Eskişehir, Turkey	39.3493	31.0553	Not sequenced, but from the same location as sequenced individuals used in the phylogeny (i.e. preparation no. 11388, 11389, 24165, 25251, 25252; Table S1)
	T. wilki sp. nov.	Fig. 27E–G	Paratype	NMNL	RMNH.MOL.342210	Çifteler spring, Çifteler, Eskişehir, Turkey	39.3493	31.0553	Not sequenced, but from the same location as sequenced individuals used in the phylogeny (i.e. preparation no. 11388, 11389, 24165, 25251, 25252; Table S1)
	T. wilki sp. nov.	Fig. 27H–J	Paratype	NMNL	RMNH.MOL.342211	Çifteler spring, Çifteler, Eskişehir, Turkey	39.3493	31.0553	Not sequenced, but from the same location as sequenced individuals used in the phylogeny (i.e. preparation no. 11388, 11389, 24165, 25251, 25252; Table S1)
Radula
T. gurur sp. nov.	T. gurur sp. nov.	Fig. 14C, E	Paratype	UGSB	UGSB20689 (AS1A)	Suyunbaşı spring complex, Ayrancılar, İzmir, Turkey	38.2483	27.2812	Not sequenced, but from the same location as sequenced individuals used in the phylogeny (i.e. preparation no. 11421, 24166, 24177, 25255, 25256; Table S1)
	T. gurur sp. nov.	Fig. 14A, B, D, F	Paratype	UGSB	UGSB20689 (AS1B)	Suyunbaşı spring complex, Ayrancılar, İzmir, Turkey	38.2483	27.2812	Not sequenced, but from the same location as sequenced individuals used in the phylogeny (i.e. preparation no. 11421, 24166, 24177, 25255, 25256; Table S1)
T. wesselinghi sp. nov.	T. wesselinghi sp. nov.	Fig. 25A, B, D	Paratype	UGSB	UGSB20688 (AS4C)	Sakarya River, Çayköy, Bilecik, Turkey	40.0439	30.452	Not sequenced, but from the same location as sequenced individuals used in the phylogeny (i.e. preparation no. 25253, 25254; Table S1)
	T. wesselinghi sp. nov.	Fig. 25C	Paratype	UGSB	UGSB20684 (AS3A)	roadside spring in Fele, Isparta province, Turkey	38.0036	31.4722	Not sequenced, but from the same location as sequenced individuals used in the phylogeny (i.e. preparation no. 11390, 11391, 24167, 24178, 25245, 25246; Table S1)
	T. wesselinghi sp. nov.	Not displayed	Paratype	UGSB	UGSB20684 (AS3B)	roadside spring in Fele, Isparta province, Turkey	38.0036	31.4722	Not sequenced, but from the same location as sequenced individuals used in the phylogeny (i.e. preparation no. 11390, 11391, 24167, 24178, 25245, 25246; Table S1)
	T. wesselinghi sp. nov.	Not displayed	Paratype	UGSB	UGSB20686 (AS4B)	Balıkdamı Wetland spring, Eskişehir, Turkey	39.1528	31.6156	Not sequenced, but from the same location as sequenced individuals used in the phylogeny (i.e. preparation no. 25249, 25250; Table S1)
	T. wesselinghi sp. nov.	Fig. 25E	Paratype	UGSB	UGSB20686 (AS4A)	Balıkdamı Wetland spring, Eskişehir, Turkey	39.1528	31.6156	Not sequenced, but from the same location as sequenced individuals used in the phylogeny (i.e. preparation no. 25249, 25250; Table S1)
	T. wesselinghi sp. nov.	Not displayed	Paratype	UGSB	UGSB20685 (AS3C)	Eflatun Pınarı, Konya province, Turkey	37.8256	31.6748	Not sequenced, but from the same location as sequenced individuals used in the phylogeny (i.e. preparation no. 11393, 24164, 24176, 25247, 25248; Table S1)
	T. wesselinghi sp. nov.	Fig. 25F	Paratype	UGSB	UGSB20685 (AS3D)	Eflatun Pınarı, Konya province, Turkey	37.8256	31.6748	Not sequenced, but from the same location as sequenced individuals used in the phylogeny (i.e. preparation no. 11393, 24164, 24176, 25247, 25248; Table S1)
T. wilkei sp. nov.	T. wilki sp. nov.	Fig. 28A–C, E	Paratype	UGSB	UGSB 20687 (AS2A)	Çifteler spring, Çifteler, Eskişehir, Turkey	39.3493	31.0553	Not sequenced, but from the same location as sequenced individuals used in the phylogeny (i.e. preparation no. 11388, 11389, 24165, 25251, 25252; Table S1)
	T. wilki sp. nov.	Fig. 28D, F	Paratype	UGSB	UGSB 20687 (AS2B)	Çifteler spring, Çifteler, Eskişehir, Turkey	39.3493	31.0553	Not sequenced, but from the same location as sequenced individuals used in the phylogeny (i.e. preparation no. 11388, 11389, 24165, 25251, 25252; Table S1)
Institution abbreviations
COMULM	Çanakkale Onsekiz Mart University, Limnology Museum, Çanakkale, Turkey
IZAN	I.I. Schmalhausen Institute of Zoology, National Academy of Sciences of Ukraine, Kiev, Ukraine
MHNG	Muséum d'histoire naturelle, Genève, Switzerland
MNHN	Muséum national d'Histoire naturelle Paris, France
MSNG	Museo Civico di Storia Naturale “Giacomo Doria”, Genova, Italy
NMNL	Naturalis Biodiversity Center Leiden (formerly Rijksmuseum van Natuurlijke Historie), The Netherlands
RBINS	Royal Belgian Institute of Natural Sciences, Brussels, Belgium
UGSB	Justus Liebig University Giessen, Systematics and Biodiversity collection, Germany
ZIN	Zoological Institute of the Russian Academy of Sciences, St. Petersburg, Russia
ZMB	Museum für Naturkunde in Berlin, Germany
ZMZ	Zoological Museum Zurich, Switzerland

## Sheet: Table S3
Table S3: Divergence dates and highest posterior densities of nodes labelled in the phylogeny (Fig. 2)
Node label	Divergence date (Mya)	Lower 95% HPD (Mya)	Upper 95% HPD (Mya)
1	15.92	23.13	9.31
2	7.73	10.63	4.5
3	6.35	9.04	3.56
4	4.64	6.76	2.71
5	1.95	3.03	0.96
6	0.72	1.15	0.29
7	1.2	1.89	0.54
8	3.92	5.66	2.09
9	1.54	2.41	0.72
10	0.86	1.35	0.39
11	0.44	0.72	0.16
12	1.86	2.86	0.91
13	0.93	1.45	0.46
14	1.15	1.9	0.4
15	0.06	0.09	0
16	0.12	0.21	0.01
17	1.18	2	0.45
18	0.43	0.74	0.14
19	0.14	0.24	0.02
20	2.84	4.31	1.46
21	1.47	2.21	0.72
22	0.68	1.1	0.26
23	0.96	1.44	0.49
24	0.95	1.61	0.36
25	2.58	3.91	1.33
26	2.05	3.18	0.98
27	0.53	0.94	0.16
28	0.68	1.09	0.26
29	1.46	2.43	0.59
30	0.38	0.71	0.08
31	5.12	8.09	2.38
32	0.18	0.32	0.04
